# Supplementary material for: Differential expression profiles of microRNAs in musk gland of unmated and mated forest musk deer (Moschus berezovskii)
Source: PeerJ. 2021 Dec 22;9:e12710. doi: 10.7717/peerj.12710 (PMC8710055; doi:10.7717/peerj.12710)
Supplement: Supplemental Information 1 [file peerj-09-12710-s001.xlsx]

## Sheet: Table S1
Table S1. Overview of small RNA deep sequencing data in musk glands of unmated and mated musk deer
Sample	Raw reads			Clean reads
	Total reads	Base (bp)		Total reads	Unique reads	Base (bp)	Average length (bp)	Clean ratio
Unmated	26179144	1308957200		19435154	1206318	971757700	23.73	0.7424
Mated	23573546	1178677300		16818354	1518258	840917700	23.96	0.7134
