# Supplementary material for: Differential expression profiles of microRNAs in musk gland of unmated and mated forest musk deer (Moschus berezovskii)
Source: PeerJ. 2021 Dec 22;9:e12710. doi: 10.7717/peerj.12710 (PMC8710055; doi:10.7717/peerj.12710)
Supplement: Supplemental Information 2 [file peerj-09-12710-s002.xlsx]

## Sheet: Sheet2
Table S2. Total small RNA annotation
Sample	All reads	rRNA	snoRNA	tRNA	scRNA	Repeat	snRNA	miRNA	Unannotated
Unmated	19,435,154 (100%)	473,601 (2.44%)	983 (0.01%)	2,579,932 (13.27%)	663 (0.00%)	589,488 (3.03%)	1,943,052 (10.00%)	5,512,277 (28.36%)	8,335,158 (42.89%)
Mated	16,818,354 (100%)	741,120 (4.41%)	1,160 (0.01)	2,294,704 (13.64%)	923 (0.01%)	1,486,496 (8.84%)	1,407,864 (8.37%)	3,455,159 (20.54%)	7,430,928 (44.18%)
