# Supplementary material for: Differential expression profiles of microRNAs in musk gland of unmated and mated forest musk deer (Moschus berezovskii)
Source: PeerJ. 2021 Dec 22;9:e12710. doi: 10.7717/peerj.12710 (PMC8710055; doi:10.7717/peerj.12710)
Supplement: Supplemental Information 3 [file peerj-09-12710-s003.xlsx]

## Sheet: unmated+mated_known_miRNA
Table S3. Total known microRNAs in unmated and mated libraries
miRNA name	Sequence	miRNA Family	Reads count in unmated library	Reads count in mated library
bta-miR-26a	TTCAAGTAATCCAGGATAGGCT	NA	569381	153402
gga-miR-21-5p	TAGCTTATCAGACTGATGTTGA	NA	554279	176821
chi-miR-21-5p	TAGCTTATCAGACTGATGTTGAC	NA	448269	139420
bta-miR-125b	TCCCTGAGACCCTAACTTGTGA	NA	374420	125218
ipu-miR-99b	AACCCGTAGATCCGATCTTGTGA	mir-10	239591	69071
bta-miR-27b	TTCACAGTGGCTAAGTTCTGC	mir-27	169029	73382
chi-miR-199b-3p	ACAGTAGTCTGCACATTGGTT	NA	168637	99475
xtr-miR-26	TTCAAGTAATCCAGGATAGGC	NA	114262	34987
bta-let-7g	TGAGGTAGTAGTTTGTACAGTT	let-7	105570	50949
bta-let-7b	TGAGGTAGTAGGTTGTGTGGTT	let-7	103933	90877
chi-miR-29a-3p	TAGCACCATCTGAAATCGGTT	NA	100484	60757
oar-miR-125b	TCCCTGAGACCCTAACTTGTG	mir-10	96495	32763
chi-miR-24-3p	TGGCTCAGTTCAGCAGGAAC	NA	85282	93869
bta-miR-199a-5p	CCCAGTGTTCAGACTACCTGTT	NA	66974	35032
cfa-miR-16	TAGCAGCACGTAAATATTGGCG	NA	64734	27082
bta-miR-26b	TTCAAGTAATTCAGGATAGGTT	mir-26	61211	25728
eca-miR-195	TAGCAGCACAGAAATATTGGC	mir-15	60742	26645
ggo-miR-200b	TAATACTGCCTGGTAATGATGAC	mir-8	59470	5458
bta-miR-200c	TAATACTGCCGGGTAATGATGGA	mir-8	54412	3255
bta-miR-16b	TAGCAGCACGTAAATATTGGC	mir-15	53671	25240
pma-miR-205a-5p	TCCTTCATTCCACCGGAGTCTGT	NA	53415	10527
chi-miR-126-3p	TCGTACCGTGAGTAATAATGC	NA	49480	26442
bta-miR-126-5p	CATTATTACTTTTGGTACGCG	NA	47199	42085
bta-miR-21-5p	TAGCTTATCAGACTGATGTTGACT	NA	44927	8044
chi-miR-125b-5p	TCCCTGAGACCCTAACTTGT	NA	39682	24432
bta-miR-151-5p	TCGAGGAGCTCACAGTCTAGT	NA	39559	19313
tgu-miR-126-3p	TCGTACCGTGAGTAATAATGCG	NA	38964	40590
bta-miR-195	TAGCAGCACAGAAATATTGGCA	mir-15	38749	11532
chi-miR-191-5p	CAACGGAATCCCAAAAGCAGCT	NA	38239	25155
chi-miR-125a-5p	TCCCTGAGACCCTTTAACCTGT	NA	37351	19915
xtr-miR-199a-3p	TACAGTAGTCTGCACATTGGTT	NA	37312	14203
chi-miR-199a-5p	CCCAGTGTTCAGACTACCTGTTC	NA	37186	20303
oar-miR-27a	TTCACAGTGGCTAAGTTCCGC	mir-27	36319	11115
bta-miR-199a-3p	ACAGTAGTCTGCACATTGGTTA	NA	34311	12781
oar-let-7b	TGAGGTAGTAGGTTGTGTGGT	let-7	34115	46932
bta-let-7i	TGAGGTAGTAGTTTGTGCTGTT	let-7	33844	43199
bta-miR-205	TCCTTCATTCCACCGGAGTCTG	mir-205	31234	4523
bta-miR-221	AGCTACATTGTCTGCTGGGTTT	mir-221	28276	13917
oar-miR-26b	TTCAAGTAATTCAGGATAGGT	mir-26	27783	12343
cfa-miR-29a	TAGCACCATCTGAAATCGGTTA	mir-29	27609	15566
oar-let-7g	TGAGGTAGTAGTTTGTACAGT	let-7	27576	15298
cfa-miR-203	GTGAAATGTTTAGGACCACTAG	mir-203	24695	1443
bta-miR-191	CAACGGAATCCCAAAAGCAGCTG	mir-191	23955	11298
chi-miR-23a	ATCACATTGCCAGGGATTTCC	mir-23	22627	17596
bta-miR-186	CAAAGAATTCTCCTTTTGGGCT	mir-186	22332	19109
bta-miR-30b-5p	TGTAAACATCCTACACTCAGCT	NA	21404	17150
bta-miR-145	GTCCAGTTTTCCCAGGAATCCCT	mir-145	20893	176849
bta-miR-25	CATTGCACTTGTCTCGGTCTGA	mir-25	20200	17114
bta-miR-24-3p	TGGCTCAGTTCAGCAGGAACAG	NA	19648	13763
chi-miR-200b	TAATACTGCCTGGTAATGATGA	mir-8	18205	1532
bta-miR-103	AGCAGCATTGTACAGGGCTATGA	NA	18153	4325
gga-miR-146a-5p	TGAGAACTGAATTCCATGGGTT	NA	17750	11777
ccr-miR-143	TGAGATGAAGCACTGTAGCT	mir-143	17431	90613
bta-miR-148a	TCAGTGCACTACAGAACTTTGT	mir-148	16293	15799
chi-miR-23b-3p	ATCACATTGCCAGGGATTACC	NA	15517	11527
chi-miR-374a-5p	TTATAATACAACCTGATAAGT	NA	15494	4154
xtr-miR-22-3p	AAGCTGCCAGTTGAAGAACTGT	NA	15415	67707
bta-miR-125a	TCCCTGAGACCCTTTAACCTGTG	mir-10	14830	4519
ggo-miR-23b	ATCACATTGCCAGGGATTACCA	mir-23	14514	9859
sha-miR-205	TCCTTCATTCCACCGGAGTCT	mir-205	14436	7234
oar-miR-152	TCAGTGCATGACAGAACTTGG	mir-148	14251	9290
oar-miR-181a	AACATTCAACGCTGTCGGTGAGT	NA	13848	10967
prd-let-7-5p	TGAGGTAGTAGGTTGTATAGTTT	NA	13599	6660
bta-miR-200a	TAACACTGTCTGGTAACGATGTT	mir-8	13367	1504
bta-miR-23a	ATCACATTGCCAGGGATTTCCA	mir-23	12846	9264
oar-miR-200c	TAATACTGCCGGGTAATGATGG	mir-8	12776	965
dre-miR-27b-3p	TTCACAGTGGCTAAGTTCTGCA	NA	12045	4487
cgr-miR-26a	TTCAAGTAATCCAGGATAGG	mir-26	11987	5496
ipu-miR-126a	TCGTACCGTGAGTAATAATGCA	mir-126	11984	6598
gga-miR-30c-5p	TGTAAACATCCTACACTCTCAGCT	NA	11527	11182
mdo-miR-186-5p	CAAAGAATTCTCCTTTTGGGCTT	NA	11514	8329
bta-miR-23b-3p	ATCACATTGCCAGGGATTACCAC	NA	11350	6817
bta-miR-10b	TACCCTGTAGAACCGAATTTGTG	mir-10	10930	11878
bta-miR-361	TTATCAGAATCTCCAGGGGTAC	mir-361	10921	4723
xtr-miR-200a	TAACACTGTCTGGTAACGATGT	mir-8	10329	1213
oar-miR-143	TGAGATGAAGCACTGTAGCTC	mir-143	9920	175939
xtr-miR-221	AGCTACATTGTCTGCTGGGTTTC	mir-221	9625	2873
age-miR-29a	CTAGCACCATCTGAAATCGGTT	mir-29	9487	6133
eca-miR-125a-5p	TCCCTGAGACCCTTTAACCTGTGA	NA	9439	2112
ssc-miR-199b-5p	CCCAGTGTTTAGACTATCTGTT	NA	9066	12340
bta-miR-30c	TGTAAACATCCTACACTCTCAGC	mir-30	9048	13200
aca-miR-199a-5p	CCCAGTGTTCAGACTACCTGT	NA	8973	7113
bta-miR-27a-3p	TTCACAGTGGCTAAGTTCCG	NA	8948	5049
bta-miR-339a	TCCCTGTCCTCCAGGAGCTCAC	mir-339	8741	3707
tgu-miR-126-5p	CATTATTACTTTTGGTACGC	NA	8613	2796
efu-miR-16	TAGCAGCACGTAAATATTGGCGT	NA	8493	2863
tch-miR-27a-3p	TTCACAGTGGCTAAGTTCCGT	NA	8446	3800
bta-miR-30e-5p	TGTAAACATCCTTGACTGGAAGCT	NA	8369	3862
bta-miR-365-3p	TAATGCCCCTAAAAATCCTTAT	NA	8291	6427
cfa-miR-497	CAGCAGCACACTGTGGTTTGT	mir-497	8193	6727
ggo-miR-191	CAACGGAATCCCAAAAGCAGC	mir-191	7636	5877
bta-miR-98	TGAGGTAGTAAGTTGTATTGTT	let-7	7551	5254
bta-miR-199b	CCCAGTGTTTAGACTATCTGTTC	mir-199	7391	6371
bta-miR-30a-5p	TGTAAACATCCTCGACTGGAAGCT	NA	7388	9043
dre-miR-145-5p	GTCCAGTTTTCCCAGGAATCCC	NA	7027	56177
ssa-miR-23b-3p	ATCACATTGCCAGGGATTACCACC	NA	6747	3046
bta-miR-30d	TGTAAACATCCCCGACTGGAAGCT	mir-30	6567	6215
bta-miR-99b	CACCCGTAGAACCGACCTTGCG	mir-10	6549	8172
oar-miR-30a-5p	TGTAAACATCCTCGACTGGAAGC	NA	6515	9866
oar-miR-374b	ATATAATACAACCTGCTAAGT	mir-374	6068	3359
ssc-miR-339	TCCCTGTCCTCCAGGAGCTCA	NA	6052	6565
sha-miR-126	TCGTACCGTGAGTAATAAT	mir-126	6039	3244
mdo-miR-23a-3p	ATCACATTGCCAGGGATTTC	NA	5924	7021
tch-miR-30a-5p	TGTAAACATCCTCGACTGGA	NA	5733	3391
oan-miR-30d-5p	TGTAAACATCCCCGACTGGAAGC	NA	5714	7106
bta-miR-362-5p	AATCCTTGGAACCTAGGTGTGAGT	NA	5500	1023
oan-miR-145-5p	GTCCAGTTTTCCCAGGAAT	NA	5398	16611
pma-miR-221	AGCTACATTGTCTGCTGGGTTC	mir-221	5336	2550
oar-miR-10b	ACCCTGTAGAACCGAATTTGTG	mir-10	5114	7263
bta-miR-429	TAATACTGTCTGGTAATGCCGT	mir-8	4962	397
oar-miR-23b	ATCACATTGCCAGGGATT	mir-23	4808	3740
bta-miR-3613a	TGTTGTACTTTTTTTTTTGTTC	mir-3613	4767	2136
ola-miR-27d-3p	TTCACAGTGGCTAAGTTC	NA	4681	2664
bta-miR-151-3p	CTAGACTGAAGCTCCTTGAGG	NA	4647	5227
bta-miR-200b	TAATACTGCCTGGTAATGATG	mir-8	4551	555
xtr-let-7i	TGAGGTAGTAGTTTGTGCTGT	let-7	4458	9185
mdo-miR-22-3p	AAGCTGCCAGTTGAAGAACTGC	NA	4421	19739
bta-miR-126-3p	CGTACCGTGAGTAATAATGCG	NA	4194	7203
gga-miR-142-5p	CCCATAAAGTAGAAAGCACTAC	NA	4177	1293
bfl-miR-100-5p	AACCCGTAGATCCGAACTTGTGT	NA	4136	4040
bta-miR-497	CAGCAGCACACTGTGGTTTGTA	mir-497	4121	1852
ola-miR-126-3p	TCGTACCGTGAGTAATAATG	NA	4088	3976
sha-miR-221	AGCTACATTGTCTGCTGGGTT	mir-221	3899	3030
bta-miR-222	AGCTACATCTGGCTACTGGGT	mir-221	3791	2519
ggo-miR-127	TCGGATCCGTCTGAGCTTGGC	mir-127	3686	2884
lla-miR-143	TGAGATGAAGCACTGTAGCTCA	mir-143	3680	19915
bta-miR-6119-5p	AGAGGTAAAAAATTGATTTGACT	NA	3667	1313
bta-miR-378	ACTGGACTTGGAGTCAGAAGGC	NA	3609	6131
chi-miR-224-5p	CAAGTCACTAGTGGTTCCGTTT	NA	3543	2257
bta-miR-320a	AAAAGCTGGGTTGAGAGGGCGA	NA	3380	2417
ssc-miR-151-3p	CTAGACTGAAGCTCCTTGAGGA	NA	3358	2533
chi-miR-28-3p	CACTAGATTGAGAGCTCCTGGA	NA	3320	4163
bta-miR-15b	TAGCAGCACATCATGGTTTACA	mir-15	3276	634
bta-miR-127	TCGGATCCGTCTGAGCTTGGCT	mir-127	3133	1995
pma-miR-26b-5p	TTCAAGTAATCCAGGATAGGTT	NA	3123	960
tgu-miR-17a-5p	CAAAGTGCTTACAGTGCAGGTAG	NA	3052	821
pma-miR-199b-3p	CAGTAGTCTGCACATTGGTTA	NA	3009	1147
chi-miR-145-3p	ATTCCTGGAAATACTGTTCTT	NA	2995	8232
ola-miR-125c	TCCCTGAGACCCTAACTTGTGAC	mir-10	2934	968
cfa-miR-31	AGGCAAGATGCTGGCATAGCTGT	mir-31	2916	521
chi-miR-150	TCTCCCAACCCTTGTACCAGTG	mir-150	2912	2402
dre-miR-27a-3p	TTCACAGTGGCTAAGTTCCGCT	NA	2898	955
dre-miR-141-3p	TAACACTGTCTGGTAACGATGC	NA	2762	336
aca-miR-19b	TGTGCAAATCCATGCAAAACT	mir-19	2760	1316
xtr-miR-30d	TGTAAACATCCCCGACTGGAAG	mir-30	2748	3078
oar-miR-30b	TGTAAACATCCTACACTCAGC	mir-30	2713	2938
bta-miR-1	TGGAATGTAAAGAAGTATGTAT	NA	2670	87170
efu-miR-199	TACAGTAGTCTGCACATTGGTTA	NA	2665	722
ggo-miR-125a	TCCCTGAGACCCTTTAACCTG	mir-10	2660	1265
bta-miR-19b	TGTGCAAATCCATGCAAAACTGA	mir-19	2643	1022
pma-miR-27a	TTCACAGTGGCTAAGTTCCAC	mir-27	2629	748
bta-miR-182	TTTGGCAATGGTAGAACTCACACT	mir-182	2616	338
xtr-miR-30a-5p	TGTAAACATCCTCGACTGGAAG	NA	2578	3462
cfa-miR-24	TGGCTCAGTTCAGCAGGAACAGG	NA	2538	1902
chi-miR-28-5p	AAGGAGCTCACAGTCTATTGA	NA	2496	1587
chi-miR-29b-3p	TAGCACCATTTGAAATCAGT	NA	2438	1405
bta-miR-28	AAGGAGCTCACAGTCTATTGAG	mir-28	2337	3368
xtr-miR-29a	TAGCACCATTTGAAATCGGTT	mir-29	2335	3416
bta-miR-380-3p	TATGTAATGTGGTCCACGTCT	NA	2296	975
chi-miR-126-5p	CATTATTACTTTTGGTACGCGC	NA	2192	1052
sha-miR-24	TGGCTCAGTTCAGCAGGAA	NA	2185	1580
ola-miR-24b-3p	TGGCTCAGTTCAGCAGGA	NA	2127	748
pma-miR-152a	TCAGTGCATGACAGAACTTGA	mir-148	2126	927
mdo-miR-30d-5p	TGTAAACATCCTTGACTGGAAGC	NA	2040	1268
bta-miR-423-5p	TGAGGGGCAGAGAGCGAGACTTT	NA	2037	3020
bta-miR-223	TGTCAGTTTGTCAAATACCCCA	mir-223	2013	172
xla-miR-223	TGTCAGTTTGTCAAATACCCC	mir-223	1947	119
sha-miR-141	TAACACTGTCTGGTAAAGATG	mir-8	1946	126
aca-miR-98-5p	TGAGGTAGTAAGTTGTATTGT	NA	1942	1820
ggo-miR-151a	TCGAGGAGCTCACAGTCTAG	mir-28	1905	804
bta-miR-20a	TAAAGTGCTTATAGTGCAGGTAG	mir-17	1905	264
bta-miR-31	AGGCAAGATGCTGGCATAGCT	mir-31	1851	229
bta-miR-155	TTAATGCTAATCGTGATAGGGGT	mir-155	1847	1418
cfa-miR-23a	ATCACATTGCCAGGGATTT	mir-23	1799	2758
bta-miR-140	TACCACAGGGTAGAACCACGGA	mir-140	1759	3703
ggo-miR-146a	TGAGAACTGAATTCCATGGGT	mir-146	1759	2317
bta-miR-148b	TCAGTGCATCACAGAACTTTGT	mir-148	1699	2153
xtr-miR-200b	TAATACTGCCTGGTAATGATGAT	mir-8	1678	305
bta-miR-1468	CTCCGTTTGCCTGTTTTGCTGA	mir-1468	1674	2071
chi-miR-127-3p	TCGGATCCGTCTGAGCTTGG	NA	1672	1882
tgu-miR-142-5p	CCCATAAAGTAGAAAGCACT	NA	1658	1145
chi-miR-218	TTGTGCTTGATCTAACCATGT	mir-218	1613	862
oar-miR-16b	TAGCAGCACGTAAATATTGG	mir-15	1609	1259
mdo-miR-145-3p	ATTCCTGGAAATACTGTTCT	NA	1603	6324
gga-miR-126-3p	TCGTACCGTGAGTAATAATGCGC	NA	1588	1187
bta-miR-708	AAGGAGCTTACAATCTAGCTGGG	mir-708	1544	203
chi-miR-93-5p	CAAAGTGCTGTTCGTGCAGGTAG	NA	1530	1716
bta-let-7d	AGAGGTAGTAGGTTGCATAGTT	let-7	1516	1738
cfa-miR-574	CACGCTCATGCACACACCCACA	mir-574	1508	1358
xtr-miR-145	GTCCAGTTTTCCCAGGAATCCCTT	mir-145	1457	13001
bta-miR-185	TGGAGAGAAAGGCAGTTCCTGA	mir-185	1457	1477
ssc-let-7i	TGAGGTAGTAGTTTGTGCT	let-7	1455	1105
chi-miR-130a-3p	CAGTGCAATGTTAAAAGGGCA	NA	1446	516
sha-miR-93	CAAAGTGCTGTTCGTGCAGGT	mir-17	1439	959
ame-miR-125	CCCCTGAGACCCTAACTTGTGA	mir-10	1438	522
bta-miR-107	AGCAGCATTGTACAGGGCTATC	mir-103	1434	398
chi-miR-200a	TAACACTGTCTGGTAACGATG	mir-8	1429	191
bta-miR-204	TTCCCTTTGTCATCCTATGCCT	mir-204	1400	1374
xtr-miR-34a	TGGCAGTGTCTTAGCTGGTTGTT	mir-34	1364	487
bta-miR-374a	TTATAATACAACCTGATAAGTG	mir-374	1337	742
age-miR-27a	TTCACAGTGGCTAAGTTCCGCC	mir-27	1332	588
cgr-miR-31-5p	AGGCAAGATGCTGGCATAGCTG	NA	1328	197
bta-miR-106b	TAAAGTGCTGACAGTGCAGAT	mir-17	1304	569
ssc-miR-320	AAAAGCTGGGTTGAGAGGGCGAA	mir-320	1296	1099
bta-miR-532	CATGCCTTGAGTGTAGGACCGT	mir-188	1296	1139
bta-miR-339b	TCCCTGTCCTCCAGGAGCTC	NA	1253	3898
tch-miR-26a-2-5p	TTCAAGTAACCCAGGATAGGCT	NA	1252	296
cfa-miR-181a	AACATTCAACGCTGTCGGTGAG	NA	1227	1215
bta-miR-34a	TGGCAGTGTCTTAGCTGGTTGT	mir-34	1205	499
oar-miR-103	AGCAGCATTGTACAGGGCTATG	mir-103	1192	692
sme-miR-31b-5p	AGGCAAGATGCTGGCATAGCTGA	NA	1189	134
chi-miR-140-5p	CAGTGGTTTTACCCTATGGTAG	NA	1186	682
chi-miR-101-3p	TACAGTACTGTGATAACTGA	NA	1185	747
ccr-miR-125c	TCCCTGAGACCCTAACTCGTGA	mir-10	1148	327
bta-miR-150	TCTCCCAACCCTTGTACCAGTGT	mir-150	1113	681
sha-miR-101	GTACAGTACTGTGATAACTGA	mir-101	1111	1185
oar-miR-30c	TGTAAACATCCTACACTCTCA	mir-30	1097	1325
tch-miR-374b-5p	ATATAATACAACCTGCTAAGTGT	NA	1072	684
chi-miR-181b-5p	AACATTCATTGCTGTCGGTGGGT	NA	1070	852
ssa-miR-10d-5p	CACCCTGTAGAACCGAATTTGT	NA	1036	939
ggo-miR-222	AGCTACATCTGGCTACTGGGTC	mir-221	1022	688
cfa-miR-140	ACCACAGGGTAGAACCACGGA	mir-140	1022	1435
chi-miR-374a-3p	CTTATCAGGTTGTATTGTAATT	NA	1020	240
bta-miR-379	TGGTAGACTATGGAACGTAGG	mir-379	1019	301
hsa-miR-221-5p	ACCTGGCATACAATGTAGATTT	NA	1009	146
pma-miR-1c-3p	TGGAATGTAAAGAAGTATGTAC	NA	1008	25263
xtr-miR-101a	TACAGTACTGTGATAACTGAAG	NA	988	653
bta-miR-374b	ATATAATACAACCTGCTAAGTG	mir-374	933	880
bta-miR-146b	TGAGAACTGAATTCCATAGGCTGT	mir-146	933	788
tgu-miR-29b-3p	TAGCACCATTTGAAATCAGTG	NA	918	997
xtr-miR-107	AGCAGCATTGTACAGGGCTATCA	mir-103	906	118
cgr-miR-362	AATCCTTGGAACCTAGGTGTGAGTGC	mir-362	896	169
mml-miR-130a-3p	CAGTGCAATGTTAAAAGGGC	NA	895	814
ipu-miR-155	TTAATGCTAATCGTGATAGGGGTT	mir-155	892	292
cfa-miR-19b	TGTGCAAATCCATGCAAAACTG	NA	870	478
chi-miR-193b-3p	AACTGGCCCACAAAGTCCCGCT	NA	864	1785
tgu-miR-10a-3p	AGATTCGATTCTAGGGGAAT	NA	863	400
bta-miR-214	ACAGCAGGCACAGACAGGCAGT	mir-214	858	1201
chi-miR-423-3p	AGCTCGGTCTGAGGCCCCTCAGT	NA	852	1166
bta-miR-2284x	TGAAAAGTTCGTTCGGGTTTT	mir-2284	850	1201
bta-miR-500	TAATCCTTGCTACCTGGGTGAGA	mir-500	847	356
bta-miR-93	CAAAGTGCTGTTCGTGCAGGTA	mir-17	827	474
bta-miR-139	TCTACAGTGCACGTGTCTCCAGT	mir-139	825	2748
efu-miR-196	TAGGTAGTTTCATGTTGTTGGGA	mir-196	816	1256
ssa-miR-26d-5p	TTCAAGTAATCTAGGATAGGCT	NA	809	244
bta-miR-197	TTCACCACCTTCTCCACCCAGC	mir-197	807	1343
chi-miR-30f-5p	TGTAAACACCCTACACTCTCAGC	NA	806	3778
cfa-miR-200b	CATCTTACTGGGCAGCATTGGA	mir-8	801	86
cfa-miR-652	AATGGCGCCACTAGGGTTGTGC	mir-652	799	648
xtr-miR-451	AAACCGTTACCATTACTGAGTT	mir-451	785	51072
ccr-miR-126-3p	CTCGTACCGTGAGTAATAATGC	NA	776	652
chi-miR-10b-3p	ACAGATTCGATTCTAGGGGAAT	NA	774	401
bta-miR-10a	TACCCTGTAGATCCGAATTTGTG	mir-10	766	1435
eca-miR-140-3p	TACCACAGGGTAGAACCACGG	NA	749	1717
bta-miR-30f	TGTAAACACCCTACACTCTCAGCT	mir-30	735	2945
chi-miR-133a-3p	TTTGGTCCCCTTCAACCAGCTGT	NA	729	26403
chi-let-7a-3p	CTATACAATCTACTGTCTTTCC	NA	728	437
chi-miR-140-3p	ACCACAGGGTAGAACCACGGAC	NA	715	2481
bta-miR-141	TAACACTGTCTGGTAAAGATGG	mir-8	705	46
bta-miR-411a	ATAGTAGACCGTATAGCGTACG	mir-379	702	301
dre-miR-199-3-3p	ACAGTAGTCCGCACATTGGTT	NA	696	432
cgr-miR-106b-5p	TAAAGTGCTGACAGTGCAGATA	NA	683	243
cgr-miR-1839-5p	AAGGTAGATAGAACAGGTCTTGT	NA	681	506
efu-miR-200b	TAATACTGCCTGGTAATGATGACG	mir-8	676	74
ccr-miR-182-5p	TTTGGCAATGGTAGAACTCACAC	NA	672	100
chi-miR-22-5p	AGTTCTTCAGTGGCAAGCTTT	NA	669	1481
pma-miR-146-5p	TGAGAACTGAATTCCATAGGCT	NA	661	804
cfa-miR-1839	AAGGTAGATAGAACAGGTCTTG	mir-1839	660	422
xtr-miR-30e	TGTAAACATCCTTGACTGGAAG	mir-30	656	410
bta-miR-17-5p	CAAAGTGCTTACAGTGCAGGTAGT	NA	649	138
cgr-miR-182	TTTGGCAATGGTAGAACTCACACC	mir-182	646	83
ccr-miR-181a	AACATTCAACGCTGTCGGTGA	mir-181	633	542
chi-miR-129-5p	CTTTTTGCGGTCTGGGCTTGC	NA	632	155
xtr-miR-29c-3p	TAGCACCATTTGAAATCGGT	NA	625	782
chi-miR-214-5p	TGCCTGTCTACACTTGCTGTGC	NA	621	864
efu-miR-497	CAGCAGCACACTGTGGTTTGTAC	mir-497	621	359
chi-miR-222-3p	AGCTACATCTGGCTACTGGGTCTC	NA	618	412
bta-miR-378b	ACTTGACTTGGAGTCAGAAGGC	mir-378	610	1002
chi-miR-107-3p	AGCAGCATTGTACAGGGCTAT	NA	608	647
mdo-let-7d	AGAGGTAGTAGGTTGCATAGT	let-7	597	804
bta-miR-128	TCACAGTGAACCGGTCTCTTT	NA	595	850
rno-miR-200c-3p	TAATACTGCCGGGTAATGATG	NA	589	70
bta-miR-15a	TAGCAGCACATAATGGTTTGT	mir-15	586	654
xtr-miR-155	TTAATGCTAATCGTGATAGGGG	mir-155	575	415
bta-miR-484	TCAGGCTCAGTCCCCTCCCGAT	mir-484	570	339
dre-miR-30c-5p	TGTAAACATCCTACACTCTCAG	NA	567	915
gga-miR-30e-5p	TGTAAACATCCTTGACTGG	NA	557	280
bta-miR-655	ATAATACATGGTTAACCTCTCT	mir-154	556	211
ola-miR-223	TGTCAGTTTGTCAAATACCC	mir-223	554	27
chi-miR-532-3p	CCTCCCACACCCAAGGCTTGC	NA	549	187
chi-miR-429	TAATACTGTCTGGTAATGCCG	mir-8	547	67
bta-miR-29a	CTAGCACCATCTGAAATCGGTTA	mir-29	545	291
cfa-miR-142	CCCATAAAGTAGAAAGCACTA	mir-142	533	202
ssc-miR-3613	TGTTGTACTTTTTTTTTTGT	mir-3613	526	191
eca-miR-532-3p	CCTCCCACACCCAAGGCTTGCA	NA	522	124
pma-let-7c	TGAGGTAGTAGATTGTATGGTT	let-7	518	207
tch-miR-23b-3p	ATCACATTGCCAGGGATTACCACG	NA	515	245
eca-miR-142-5p	CATAAAGTAGAAAGCACTACT	NA	513	168
oar-miR-30d	TGTAAACATCCCCGACTGG	mir-30	512	403
bta-miR-194	TGTAACAGCAACTCCATGTGGA	NA	507	398
bta-miR-181a	AACATTCAACGCTGTCGGTGAGTT	NA	507	378
bta-miR-152	TCAGTGCATGACAGAACTTGGG	mir-148	505	331
chi-let-7b-3p	CTATACAACCTACTGCCTTCCT	NA	500	358
cfa-miR-23b	ATCACATTGCCAGGGATTA	mir-23	492	468
cgr-miR-222-3p	AGCTACATCTGGCTACTGGGTCTCT	NA	490	366
cgr-miR-708	AAGGAGCTTACAATCTAGCTGG	mir-708	486	114
bta-miR-206	TGGAATGTAAGGAAGTGTGTGG	mir-1	485	42040
eca-miR-1468	CTCCGTTTGCCTGTTTTGCTG	mir-1468	483	760
bta-miR-411c-5p	GGTTGATCAGAGAACATACATT	NA	475	80
chi-miR-425-5p	AATGACACGATCACTCCCGTTGA	NA	471	206
bta-miR-96	TTTGGCACTAGCACATTTTTGCT	mir-96	470	53
bta-miR-16a	TAGCAGCACGTAAATATTGGTG	mir-15	464	187
bta-miR-196b	TAGGTAGTTTCCTGTTGTTGGGA	mir-196	461	199
bta-miR-29c	TAGCACCATTTGAAATCGGTTA	mir-29	453	591
ccr-miR-218b	TTGTGCTTGATCTAACCATGC	mir-218	452	245
bta-miR-369-3p	AATAATACATGGTTGATCTTT	NA	449	253
eca-miR-378	ACTGGACTTGGAGTCAGAAGG	mir-378	447	1149
chi-miR-338-3p	TCCAGCATCAGTGATTTTGTT	NA	429	1029
tgu-miR-155-5p	TTAATGCTAATCGTGATAGGG	NA	427	263
xtr-miR-15a	TAGCAGCACATAATGGTTTGTG	mir-15	426	285
chi-miR-411a-5p	ATAGTAGACCGTATAGCGTAC	NA	426	253
efu-miR-214	TACAGCAGGCACAGACAGGCAGT	mir-214	423	393
chi-miR-136-3p	ATCATCGTCTCAAATGAGTCT	NA	419	323
hsa-miR-151b	TCGAGGAGCTCACAGTCT	mir-28	411	154
tgu-miR-30a-3p	CTTTCAGTCGGATGTTTACAGC	NA	409	877
chi-miR-106b-3p	CCGCACTGTGGGTACTTGCT	NA	405	1009
bta-miR-181b	AACATTCATTGCTGTCGGTGGGTT	NA	400	243
ola-miR-21	TAGCTTATCAGACTGGTGTTG	NA	392	214
dre-miR-200c-3p	TAATACTGCCTGGTAATGATGC	NA	390	63
dre-miR-27c-3p	TTCACAGTGGTTAAGTTCTGC	NA	381	210
chi-miR-378-5p	CTCCTGACTCCAGGTCCTGTGT	NA	380	1021
chi-miR-3432-5p	TGCGGGATCTTTAGTTGTGGCG	NA	376	769
efu-miR-532	CATGCCTTGAGTGTAGGACCGTT	mir-188	373	246
oar-miR-17-5p	CAAAGTGCTTACAGTGCAGGTA	NA	371	124
hsa-miR-106b-3p	CCGCACTGTGGGTACTTGCTGC	NA	366	489
eca-miR-182	TTTGGCAATGGTAGAACTCACACTG	mir-182	364	32
pma-miR-203a-3p	GTGAAATGTTTAGGACCACTGG	NA	363	26
bbe-miR-210-5p	CTGTGCGTGTGACAGCGGCTGA	NA	362	51
chi-miR-494	TGAAACATACACGGGAAACCTCT	mir-154	362	160
hsa-let-7d-3p	CTATACGACCTGCTGCCTTTCT	NA	362	240
chi-miR-379-3p	TATGTAACATGGTCCACTAAC	NA	356	76
bta-miR-196a	TAGGTAGTTTCATGTTGTTGGG	NA	354	1085
chi-miR-192-5p	CTGACCTATGAATTGACAGCC	NA	353	366
efu-miR-28	AAGGAGCTCACAGTCTATTGAGT	mir-28	343	266
ggo-miR-365a	TAATGCCCCTAAAAATCCTTA	mir-365	338	382
ipu-miR-214	ACAGCAGGCACAGACAGGCAGA	mir-214	335	321
efu-miR-423	TGAGGGGCAGAGAGCGAGACTTTT	mir-423	330	388
bta-miR-92b	TATTGCACTCGTCCCGGCCTCC	mir-25	329	283
aja-miR-145	GGATTCCTGGAAATACTGTTCT	mir-145	328	1409
bta-miR-193b	AACTGGCCCACAAAGTCCCGCTTT	mir-193	324	678
gga-miR-125b-3p	ACAAGTCAGGCTCTTGGGACCT	NA	323	407
bta-miR-455-3p	GCAGTCCATGGGCATATACACT	NA	323	360
oar-miR-29b	TAGCACCATTTGAAATCAGTGT	NA	322	456
bta-miR-143	TGAGATGAAGCACTGTAGCTCG	mir-143	319	4207
bta-miR-499	TTAAGACTTGCAGTGATGTTT	mir-499	315	1352
bta-miR-424-5p	CAGCAGCAATTCATGTTTTGA	NA	313	521
mml-miR-339-5p	TCCCTGTCCTCCAGGAGCTCACG	NA	310	113
oan-miR-200b-5p	CATCTTACTGGGCAGCATTGG	NA	309	32
cfa-miR-200a	CATCTTACCGGACAGTGCTGGA	mir-8	305	33
cgr-miR-15a-5p	TAGCAGCACATAATGGTTTGTGGA	NA	302	92
cgr-miR-146b-5p	TGAGAACTGAATTCCATAGGCTG	NA	298	301
eca-miR-411	TAGTAGACCGTATAGCGTACG	mir-379	295	142
efu-miR-141	TAACACTGTCTGGTAAAGATGGC	mir-8	294	10
cfa-miR-339	TCCCTGTCCTCCAGGAGCT	NA	289	1267
ccr-miR-222	AGCTACATCTGGCTACTGGG	mir-221	286	178
bta-miR-411c-3p	TGTATGTCAACTGATCCACAGT	NA	283	67
efu-miR-125a	ACGGGTTAGGCTCTTGGGAGCT	mir-10	275	115
age-miR-20	TAAAGTGCTTATAGTGCAGGTA	mir-17	275	54
tch-miR-361-5p	TTATCAGAATCTCCAGGGGTA	NA	273	227
chi-miR-196a	TAGGTAGTTTCATGTTGTTGG	mir-196	271	776
bta-miR-22-5p	AGTTCTTCAGTGGCAAGCTTTA	NA	270	478
efu-miR-126	CTCGTACCGTGAGTAATAATGCG	mir-126	269	334
ola-miR-140-3p	ACCACAGGGTAGAACCACGG	NA	267	458
hsa-miR-29c-5p	TGACCGATTTCTCCTGGTGTTC	NA	267	450
chi-miR-22-3p	AAGCTGCCAGTTGAAGAAC	NA	266	1203
bta-miR-450a	TTTTGCGATGTGTTCCTAATAT	NA	266	427
gga-miR-32-5p	TATTGCACATTACTAAGTTGC	NA	265	131
hsa-miR-143-5p	GGTGCAGTGCTGCATCTCTGGT	NA	262	5354
bta-miR-3431	CCTCAGTCAGCCTTGTGGATGT	mir-3431	261	530
bta-miR-154c	AGATATTGCACGGTTGATCTCT	mir-154	260	381
bta-miR-495	AAACAAACATGGTGCACTTCTT	mir-329	259	250
hsa-miR-136-3p	CATCATCGTCTCAAATGAGTCT	NA	256	217
bta-miR-183	TATGGCACTGGTAGAATTCACTG	mir-183	255	21
cgr-miR-183	ATGGCACTGGTAGAATTCACTG	mir-183	255	48
bta-miR-19a	TGTGCAAATCTATGCAAAACTGA	mir-19	255	61
chi-miR-26b-3p	CCTGTTCTCCATTACTTGGCTC	NA	253	79
eca-miR-409-3p	GAATGTTGCTCGGTGAACCCCT	NA	253	260
bta-miR-29b	TAGCACCATTTGAAATCAGTGTT	NA	240	249
ipu-miR-107b	AGCAGCATTGTACAGGGCT	mir-103	239	324
chi-miR-450-5p	TTTTGCGATGTGTTCCTAAT	NA	237	407
cfa-miR-590	TAATTTTATGTATAAGCTAGT	mir-590	235	40
chi-miR-221-5p	ACCTGGCATACAATGTAGATT	NA	235	37
chi-miR-335-5p	TCAAGAGCAATAACGAAAAAT	NA	234	614
xtr-miR-128	TCACAGTGAACCGGTCTCTTTT	NA	233	483
chi-miR-183	TATGGCACTGGTAGAATTCACT	mir-183	232	36
bta-miR-129-3p	AAGCCCTTACCCCAAAAAGCAT	NA	231	34
tch-miR-140-5p	CAGTGGTTTTACCCTATGGTA	NA	228	132
tch-miR-194-5p	TGTAACAGCAACTCCATGTGGAA	NA	226	182
bta-miR-29d-5p	TGACCGATTTCTCCTGGTGTT	NA	224	418
chi-miR-708-3p	CATCTAGACTGTGAGCTTCTAGA	NA	221	31
aja-miR-7	CAACAAATCACAGTCTGCCATA	mir-7	219	187
eca-miR-224	CAAGTCACTAGTGGTTCCGTT	mir-224	217	251
efu-miR-452	TCAGTCTCATCTGCAAAGAAGT	mir-452	212	92
chi-miR-214-3p	TACAGCAGGCACAGACAGGC	NA	210	161
chi-miR-411a-3p	TATGTAACACGGTCCACTAAC	NA	209	63
bta-miR-487b	AATCGTACAGGGTCATCCACTT	mir-154	205	122
cgr-miR-29c-5p	ACCGATTTCTCCTGGTGTTCAGA	NA	205	90
cgr-miR-505-3p	GTCAACACTTGCTGGTTTCCTCT	NA	204	150
bta-miR-664b	TATTCATTTATCTCCCAGCCTAC	mir-664	204	88
bta-miR-193a-5p	TGGGTCTTTGCGGGCGAGATGA	NA	204	116
pma-miR-205b	CCCTTCATTCCACCGGAGTCTGT	mir-205	204	55
bta-miR-335	TCAAGAGCAATAACGAAAAATGT	mir-335	201	663
ccr-miR-27d	TTCACAGTGGCTAAGTTCTTC	mir-27	201	62
bta-miR-101	TACAGTACTGTGATAACTGAA	NA	200	163
xtr-miR-214	ACAGCAGGCACAGACAGGCAG	mir-214	200	297
eca-miR-196b	TAGGTAGTTTCCTGTTGTTGGG	mir-196	197	301
sla-miR-96	TTTGGCACTAGCACATTTTTGC	mir-96	195	20
tgu-miR-142-3p	GTAGTGTTTCCTACTTTATGGA	NA	195	79
cfa-miR-452	AACTGTTTGCAGAGGAAACTGA	mir-452	192	71
xtr-miR-182-5p	TTTGGCAATGGTAGAACTCACA	NA	192	55
bta-miR-218	TTGTGCTTGATCTAACCATGTG	NA	190	108
ssc-miR-194a	TGTAACAGCAACTCCATGTGG	mir-194	190	173
ssa-miR-214-3p	TACAGCAGGCACAGACAGGCAGA	NA	189	150
efu-miR-185	TGGAGAGAAAGGCAGTTCCTGAT	mir-185	189	247
ggo-miR-423	TGAGGGGCAGAGAGCGAGACTT	mir-423	188	359
bta-miR-130b	CAGTGCAATGATGAAAGGGCAT	mir-130	185	83
chi-miR-10a-3p	CAAATTCGTATCTAGGGGAAT	NA	185	161
chi-miR-133b	TTTGGTCCCCTTCAACCAGCT	mir-133	184	9014
chi-miR-99a-3p	CAAGCTCGCTTCTATGGGTCTGT	NA	183	305
bta-let-7a-3p	CTATACAATCTACTGTCTTTC	NA	182	178
bta-miR-24	GTGCCTACTGAGCTGATATCAGT	NA	181	205
cgr-miR-142-3p	GTAGTGTTTCCTACTTTATGG	NA	181	83
chi-miR-130b-5p	ACTCTTTCCCTGTTGCACTACT	NA	179	86
mdo-miR-24-5p	GTGCCTACTGAGCTGAAACACAGT	NA	176	56
ssa-miR-21a-5p	TAGCTTATCAGACTGGTGTTGACT	NA	175	29
tch-let-7a-5p	TAAGGTAGTAGATTGTATAGTT	NA	174	63
chi-miR-15a-5p	TAGCAGCACATAATGGTTTGTGG	NA	169	102
mdo-miR-199b-2-5p	CCAGTGTTCAGACTACCTGTTC	NA	168	85
bta-miR-451	AAACCGTTACCATTACTGAGTTT	mir-451	167	4562
bta-miR-345-5p	GCTGACTCCTAGTCCAGTGCT	NA	167	327
rno-miR-221-5p	ACCTGGCATACAATGTAGATTTC	NA	166	20
tgu-let-7b-3p	CTATACAACCTACTGCCTTCC	NA	162	146
sha-miR-200b	TAATACTGCCTGGTAATGA	mir-8	161	26
mmu-miR-1983	CTCACCTGGAGCATGTTTTCT	NA	158	92
ptr-miR-320d	AAAAGCTGGGTTGAGAGG	NA	157	236
bta-miR-215	ATGACCTATGAATTGACAGACA	mir-192	157	148
sha-miR-193	AACTGGCCCACAAAGTCCCGC	mir-193	157	410
sha-miR-200a	TAACACTGTCTGGTAACGA	mir-8	155	17
chi-miR-338-5p	AACAATATCCTGGTGCTGAGT	NA	153	729
bta-miR-130a	CAGTGCAATGTTAAAAGGGCAT	mir-130	152	57
oan-miR-32-5p	TATTGCACATTACTAAGTTG	NA	151	57
cgr-miR-425-3p	CATCGGGAATGTCGTGTCCGC	NA	150	130
chi-miR-101-5p	TCAGTTATCACAGTGCTGATGC	NA	149	91
cgr-miR-205	TCCTTCATTCCACCGGAGT	mir-205	149	716
chi-miR-30b-3p	CTGGGAGGTGGATGTTTACTTC	NA	146	76
bta-miR-199c	TACAGTAGTCTGCACATTGG	NA	145	116
ola-miR-20a	TAAAGTGCTTATAGTGCAGGT	NA	145	38
efu-miR-155	TTAATGCTAATCGTGATAGGGGTTT	mir-155	145	40
mml-miR-455-3p	GCAGTCCATGGGCATATACAC	NA	143	229
tgu-miR-140-3p	TACCACAGGGTAGAACCACGGAC	NA	141	642
mml-let-7b-3p	CTATACAACCTACTGCCTTCCC	NA	140	107
cgr-miR-326	CCTCTGGGCCCTTCCTCCAGT	mir-326	139	663
bta-miR-421	ATCAACAGACATTAATTGGGCGC	mir-95	139	71
mml-miR-26a-2-3p	CCTATTCTTGATTACTTGTTTC	NA	136	58
bta-miR-2285f	AAAACCTGAATGAACTTTTTGG	NA	135	69
chi-miR-505-3p	TCAACACTTGCTGGTTTCCTCT	NA	135	69
oar-miR-379-5p	TGGTAGACTATGGAACGTAGGC	NA	133	48
ggo-miR-148a	TCAGTGCACTACAGAACTTTG	mir-148	132	336
efu-miR-200a	TAACACTGTCTGGTAACGATGTTC	mir-8	132	18
bta-miR-6529a	GAGAGATCAGAGGCGCAGAGT	mir-6529	132	185
ggo-miR-487b	AATCGTACAGGGTCATCCACT	mir-154	132	93
bta-miR-376e	AACATAGAGGAAAATCCACATT	mir-368	132	66
chi-let-7c-3p	CTGTACAACCTTCTAGCTTTCC	NA	130	93
efu-miR-148	TCAGTGCATCACAGAACTTTGTC	mir-148	129	127
gga-miR-30a-3p	CTTTCAGTCGGATGTTTGCAGC	NA	124	720
bta-miR-331-3p	GCCCCTGGGCCTATCCTAGAA	NA	122	100
bta-miR-874	CTGCCCTGGCCCGAGGGACCGA	mir-874	121	286
cgr-miR-149-5p	TCTGGCTCCGTGTCTTCACTCC	NA	121	91
chi-miR-191-3p	CTGCGCTTGGATTTCGTTCCC	NA	121	88
chi-miR-874-3p	CTGCCCTGGCCCGAGGGACCGAC	NA	120	133
chi-miR-425-3p	CATCGGGAATGTCGTGTCCGCC	NA	119	85
oha-miR-429-3p	TAATACTGTCTGGTAATGCCGTC	NA	118	12
gga-miR-27b-5p	AGAGCTTAGCTGATTGGTGAACA	NA	118	85
mdo-miR-429	TAATACTGTCTGGTAATGCC	mir-8	117	11
ccr-miR-221	AGCTACATTGTCTGCTGGG	mir-221	116	79
oha-miR-199a-5p	CCCAGTGTTCGGACTACCTGTTC	NA	116	79
ssc-miR-664-3p	TATTCATTTATCTCCCAGCCTACA	NA	116	52
efu-miR-495	AAACAAACATGGTGCACTTCTTT	mir-329	116	96
cgr-let-7i	CTGCGCAAGCTACTGCCTTGC	let-7	115	481
gga-miR-101-3p	GTACAGTACTGTGATAACTGAA	NA	115	200
rno-miR-145-3p	GGATTCCTGGAAATACTGTTC	NA	114	495
gga-miR-181a-3p	ACCATCGACCGTTGATTGTACC	NA	114	59
chi-miR-27b-5p	AGAGCTTAGCTGATTGGTGAAC	NA	114	129
bta-miR-299	TGGTTTACCGTCCCACATACAT	mir-299	113	47
ssc-miR-206	TGGAATGTAAGGAAGTGTGTGA	mir-1	113	6772
chi-miR-215-5p	ATGACCTATGAATTGACAGAC	NA	113	126
cfa-miR-382	AATCATTCACGGACAACACTTT	mir-154	110	46
bta-miR-454	TAGTGCAATATTGCTTATAGGGT	mir-454	110	88
bta-miR-423-3p	AAGCTCGGTCTGAGGCCCCTCAGT	NA	110	146
bta-miR-224	CAAGTCACTAGTGGTTCCGTTTA	mir-224	106	37
bta-miR-1247-5p	ACCCGTCCCGTGCGTCCCCGGA	NA	106	123
efu-miR-181f	ACCACCGACCGTTGACTGTACC	mir-181	105	123
oan-miR-140-5p	CAGTGGTTTTACCCTATGGT	NA	103	129
rno-miR-15a-5p	TAGCAGCACATAATGGTTT	NA	102	119
chi-miR-125b-3p	ACAAGTCAGGCTCTTGGGACC	NA	102	179
efu-miR-181e	AACATTCATTGCTGTCGGTGGGTTT	mir-181	102	64
bta-miR-2284ab	TAAAAGTTTGGTTGGGTTTTT	mir-2284	102	71
bta-miR-22-3p	AAGCTGCCAGTTGAAGAACTG	NA	101	547
chi-miR-329b-3p	AACACACCTGGTTAACCTCT	NA	100	119
chi-miR-15b-3p	CGAATCATTATTTGCTGCTCT	NA	98	32
hsa-miR-1307-5p	TCGACCGGACCTCGACCGGCT	NA	98	210
chi-miR-16a-5p	TAGCAGCACGTAAATATTGGAG	NA	97	66
rno-miR-200a-5p	CATCTTACCGGACAGTGCTGG	NA	97	3
oha-miR-199b-5p	CCCAGCGTTCAGACTACCTGTTC	NA	96	68
efu-miR-92a	TATTGCACTTGTCCCGGCCTGTG	mir-25	95	119
cgr-miR-192	CTGACCTATGAATTGACAGCCA	mir-192	95	91
tgu-miR-125-2-3p	ACGGGTTAGGCTCTTGGGAGC	NA	93	114
chi-let-7e-3p	CTATACGGCCTCCTAGCTTTCC	NA	93	71
eca-miR-424	CAGCAGCAATTCATGTTTTGAA	mir-322	91	82
bta-miR-142-5p	CATAAAGTAGAAAGCACTAC	NA	91	26
chi-miR-196b	TAGGTAGTTTCCTGTTGTTGG	mir-196	91	220
chi-miR-206	TGGAATGTAAGGAAGTGTGTGGT	mir-1	90	6010
bta-miR-409a	AGGTTACCCGAGCAACTTTGCAT	mir-154	90	51
pma-miR-23a-3p	ATCACATTGCCAGGGATTACCGC	NA	90	129
cgr-miR-331-3p	GCCCCTGGGCCTATCCTAGA	NA	90	145
chi-miR-376c-3p	AACATAGAGGAAATTCCACGT	NA	89	72
chi-let-7d-3p	CTATACGACCTGCTGCCTTTC	NA	89	93
cfa-miR-450b	TTTTGCAATATGTTCCTGAAT	mir-450	89	416
chi-let-7i-3p	CTGCGCAAGCTACTGCCTTGCT	NA	89	320
rno-miR-10b-3p	ACAGATTCGATTCTAGGGGAA	NA	88	67
eca-miR-139-5p	TCTACAGTGCACGTGTCTCCAG	NA	87	230
chi-miR-30e-3p	CTTTCAGTCGGATGTTTACAG	NA	86	142
bta-miR-652	AATGGCGCCACTAGGGTTGTG	mir-652	86	104
bta-miR-1249	ACGCCCTTCCCCCCCTTCTTCA	mir-1249	83	58
ssc-miR-146b	TGAGAACTGAATTCCATAGGC	mir-146	82	123
cfa-miR-486	TCCTGTACTGAGCTGCCCCGA	mir-486	82	2302
bta-miR-505	CGTCAACACTTGCTGGTTTCCT	mir-505	82	106
ssa-let-7f-5p	TGAGGTAGTAGATTGTATTGTT	NA	81	25
chi-miR-33a-3p	CAATGTTTCCACAGTGCATCA	NA	79	23
bta-miR-449a	TGGCAGTGTATTGTTAGCTGGT	mir-449	79	48
bta-miR-758	TTTGTGACCTGGTCCACTAACC	mir-379	78	36
chi-miR-144-3p	TACAGTATAGATGATGTAC	NA	78	307
chi-miR-148a-5p	AAAGTTCTGAGACACTCCGACT	NA	78	85
hsa-miR-574-5p	TGAGTGTGTGTGTGTGAGTGTGT	NA	77	235
chi-miR-361-3p	TCCCCCAGGTGTGATTCTGATT	NA	77	218
efu-miR-331	GCCCCTGGGCCTATCCTAGAAC	mir-331	77	65
oar-miR-200a	AACACTGTCTGGTAACGAT	mir-8	76	28
ggo-miR-378a	ACTGGACTTGGAGTCAGAAGGCC	mir-378	76	100
chi-miR-490	CAACCTGGAGGACTCCATGCTGT	mir-490	75	112
chi-miR-23b-5p	TGGGTTCCTGGCATGCTGATTT	NA	75	44
bta-miR-628	ATGCTGACATATTTACTAGAGG	mir-628	74	24
hsa-miR-320d	AAAAGCTGGGTTGAGAGGA	NA	74	87
ssc-miR-758	TTTGTGACCTGGTCCACTAAC	mir-379	74	44
oar-miR-154a-3p	AATCATACACGGTTCACCTATT	NA	73	40
chi-miR-148b-5p	GAAGTTCTGTTATACACTCAGGC	NA	73	56
bta-miR-744	TGCGGGGCTAGGGCTAACAGCA	mir-744	73	59
hsa-miR-411-3p	TATGTAACACGGTCCACTAACC	NA	73	10
chi-miR-500-3p	ATGCACCTGGGCAAGGATTCT	NA	72	95
ola-miR-204	TTCCCTTTGTCATCCTATGC	mir-204	72	61
chi-miR-296-3p	AGGGTTGGGCGGAGGCTTTCCT	NA	72	82
cgr-miR-744-5p	TGCGGGGCTAGGGCTAACAGC	NA	72	48
bta-miR-188	CATCCCTTGCATGGTGGAGGGT	mir-188	71	36
ggo-miR-130b	CAGTGCAATGATGAAAGGGCA	mir-130	71	41
chi-miR-369-5p	AGATCGACCGTGTTATATTCG	NA	71	71
oar-miR-379-3p	TATGTAACATGGTCCACTAACT	NA	70	20
xtr-miR-181b	AACATTCATTGCTGTCGGTGGG	NA	69	89
bta-miR-149-5p	TCTGGCTCCGTGTCTTCACTCCC	NA	69	69
ssc-miR-362	AATCCTTGGAACCTAGGTGTGAGTG	mir-362	69	25
cin-miR-200-3p	TAATACTGCCTGGTAATGGTGA	NA	69	6
bta-miR-382	GAAGTTGTTCGTGGTGGATTCG	mir-154	69	41
ccr-miR-22b	AAGCTGCCAGTTGAAGAGCTGT	mir-22	69	329
hsa-miR-30c-1-3p	CTGGGAGAGGGTTGTTTACTCC	NA	69	39
bta-miR-2284y	AAAAGTTCGTTCGGGTTTTTC	NA	69	61
bta-miR-1247-3p	CGGGAACGTCGGGACTGGAGC	NA	68	57
sha-miR-25	CATTGCACTTGTCTCGGTC	mir-25	68	99
tgu-miR-196	TAGGTAGTTTCATGTTGTTG	mir-196	68	101
gga-miR-10b-3p	AGATTCGATTCTAGGGGAATA	NA	67	22
mml-miR-361-3p	TCCCCCAGGTGTGATTCTGATTT	NA	66	127
mml-miR-26b-3p	CCTGTTCTCCATTACTTGGCT	NA	66	58
bta-miR-1306	CCACCTCCCCTGCAAACGTCC	mir-1306	66	62
aca-let-7f-1-3p	CTATACAATCTACTGTCTTT	NA	65	70
ggo-miR-497	CAGCAGCACACTGTGGTTTG	mir-497	64	66
efu-miR-320	AAAAGCTGGGTTGAGAGGGCGAAAA	mir-320	64	47
ggo-miR-484	TCAGGCTCAGTCCCCTCCCGA	mir-484	64	57
chi-miR-25-5p	AGGCGGAGACTTGGGCAATTGCT	NA	64	86
chi-miR-29c-5p	TGACCGATTTCTCCTGGTGTTCA	NA	64	77
efu-miR-103b	AGCAGCATTGTACAGGGCTATGAAA	mir-103	64	14
ggo-miR-128	TCACAGTGAACCGGTCTCTT	mir-128	63	139
bta-miR-154b	AGAGGTCTTCCATGGTGCATTCG	mir-154	63	43
mmu-miR-98-3p	CTATACAACTTACTACTTTCCT	NA	63	67
efu-miR-874	CTGCCCTGGCCCGAGGGACCGACT	mir-874	63	59
tgu-miR-144-3p	TACAGTATAGATGATGTACT	NA	62	334
cgr-miR-214-3p	TACAGCAGGCACAGACAGG	NA	62	75
chi-miR-16b-3p	ACCAATATTATTGTGCTGCTTT	NA	61	28
ipu-miR-218a	TTGTGCTTGATCTAACCATG	NA	61	38
bta-miR-491	AGTGGGGAACCCTTCCATGAGG	mir-491	61	109
cfa-miR-15b	TAGCAGCACATCATGGTTTA	mir-15	61	57
chi-let-7f-3p	CTATACAATCTATTGCCTTCCC	NA	60	29
cfa-miR-375	TTTGTTCGTTCGGCTCGCGTGA	mir-375	60	143
bta-miR-425-3p	ATCGGGAATGTCGTGTCCGCCC	NA	60	33
sha-miR-181a-5p	AACATTCAACGCTGTCGGT	NA	60	99
bta-miR-2483-5p	CGTCAACCATCCAGCTGTTTGA	NA	60	57
bta-miR-1388-3p	ATCTCAGGTTTGTCAGCCCGCA	NA	59	43
hsa-miR-195-3p	CCAATATTGGCTGTGCTGCTCC	NA	59	86
hsa-miR-130b-5p	ACTCTTTCCCTGTTGCACTAC	NA	58	21
mdo-miR-132-5p	ACCGTGGCTTTCGATTGTTACT	NA	57	32
chi-miR-497-5p	AGCAGCACACTGTGGTTTGTAC	NA	57	40
hhi-miR-183	TATGGCACTGGTAGAATTCACTGT	mir-183	57	6
tgu-let-7f-3p	CTATACAATCTATTGCCTTCC	NA	57	41
bta-miR-543	AAACATTCGCGGTGCACTTCTT	mir-329	55	43
ola-miR-222	AGCTACATCTGGCTACTGG	mir-221	55	32
bta-miR-324	CGCATCCCCTAGGGCATTGGTGT	mir-324	55	95
ggo-miR-335	TCAAGAGCAATAACGAAAAATG	mir-335	55	174
chi-miR-382-3p	AATCATTCACGGACAACACTT	NA	55	39
mmu-miR-425-3p	ATCGGGAATGTCGTGTCCGCC	NA	55	39
ggo-miR-450a	TTTTGCGATGTGTTCCTAATA	mir-450	54	92
chi-miR-18a-5p	TAAGGTGCATCTAGTGCAGATAG	NA	54	8
chi-miR-487a-3p	AATCATACAGGGACATCCAGTT	NA	54	12
ggo-miR-499a	TTAAGACTTGCAGTGATGTT	mir-499	53	200
oar-miR-409-3p	CGAATGTTGCTCGGTGAACCCCT	NA	53	57
rno-miR-299a-3p	TATGTGGGACGGTAAACCGCT	NA	53	30
hsa-miR-92a-1-5p	AGGTTGGGATCGGTTGCAATGCT	NA	53	32
ggo-miR-148b	TCAGTGCATCACAGAACTTTG	mir-148	53	131
pol-miR-21-5p	TAGCTTATCAGACTGGTGTTGG	NA	53	42
chi-miR-188-3p	CTCCCACATGCAGGGTTTGCA	NA	53	19
ssc-miR-296-3p	AGGGTTGGGCGGAGGCTTTCC	NA	52	69
cgr-miR-199b	CCCAGTGTTTAGACTACCTGTTC	mir-199	52	35
chi-miR-544-5p	TCTTGTTAAAAGGCAGATTCT	NA	52	20
bta-miR-425-5p	ATGACACGATCACTCCCGTTGA	NA	52	46
oar-miR-329b-3p	AACACACCTGGTTAACCTCTTT	NA	52	55
chi-miR-143-5p	GGTGCAGTGCTGCATCTCTGG	NA	51	648
chi-miR-409-3p	GAATGTTGCTCGGTGAACCCC	NA	50	37
bta-miR-17-3p	ACTGCAGTGAAGGCACTTGT	NA	50	29
eca-miR-450c	TTTTGCGATGTGTTCCTAATAC	mir-450	50	79
chi-miR-188-5p	CATCCCTTGCATGGTGGAGGG	NA	50	25
eca-miR-362-3p	AACACACCTATTCAAGGATTCA	NA	50	19
chi-miR-326-3p	CCTCTGGGCCCTTCCTCCAGC	NA	49	212
oar-miR-485-3p	GTCATACACGGCTCTCCTCTCT	NA	49	30
bta-miR-190a	TGATATGTTTGATATATTAGGT	mir-190	49	40
bta-miR-2285o	AAACCCGAACGAACTTTTGG	NA	49	59
cgr-miR-31-3p	TGCTATGCCAACATATTGCCATC	NA	48	16
ggo-miR-582	TTACAGTTGTTCAACCAGTTAC	mir-582	48	16
chi-miR-1343	CTCCTGGGGCCCGCACTCTCGC	mir-1343	48	78
ccr-let-7j	TGAGGTAGTTGTTTGTACAGTT	let-7	48	22
aca-miR-145-3p	GATTCCTGGAAATACTGTTCT	NA	48	410
mdo-let-7f-2-3p	CTATACAGTCTACTGTCTTTCC	NA	48	21
ccr-miR-22a	AAGCTGCCAGCTGAAGAACTGT	mir-22	48	250
chi-miR-376c-5p	GGTGGATATTCCTTCTATGTTT	NA	47	53
lla-miR-139	TCTACAGTGCACGTGTCT	mir-139	46	87
bta-miR-328	CTGGCCCTCTCTGCCCTTCCGT	mir-328	46	63
mml-miR-195-3p	CCAATATTGGCTGTGCTGCTCCA	NA	46	22
chi-miR-182	TTTGGCAATGGTAGAACTCAC	mir-182	45	24
bta-miR-362-3p	AACACACCTATTCAAGGATTC	NA	45	34
chi-miR-224-3p	AAATGGTACCCTAGTGACTACA	NA	45	28
tgu-miR-7-1-3p	CAACAAATCACAGTCTGCCAT	NA	45	63
oan-miR-146a-5p	TGAGAACTGAATTCCACGGGTT	NA	44	35
ccr-miR-210	CTGTGCGTGTGACAGCGGCT	mir-210	44	19
oar-miR-543-3p	AAACATTCGCGGTGCACTTCTTT	NA	44	18
cgr-miR-499-5p	TTAAGACTTGCAGTGATGTTTA	NA	42	95
chi-miR-16b-5p	TAGCAGCACGTAAATATTGGGG	NA	42	22
cin-miR-141-3p	TAACACTGTCTGGTAAAGATGC	NA	42	3
oar-miR-25	ATTGCACTTGTCTCGGTCTGA	mir-25	42	38
rno-miR-452-5p	AACTGTTTGCAGAGGAAACTGAG	NA	41	34
xtr-miR-9a-3p	TAAAGCTAGATAACCGAAAGT	NA	41	24
mml-miR-660-3p	ACCTCCTGTGTGCATGGATTAC	NA	41	11
chi-miR-34c-5p	AGGCAGTGTAGTTAGCTGATTGC	NA	41	103
aca-miR-193-5p	TGGGTCTTTGCGGGCGAGATG	NA	41	34
xtr-miR-92b	TATTGCACTCGTCCCGGCCTC	mir-25	41	80
chi-miR-19b-5p	AGTTTTGCAGGTTTGCATCCAGC	NA	40	13
bta-miR-1296	TTAGGGCCCTGGCTCCATCTCC	mir-1296	40	36
mml-miR-145-3p	GGATTCCTGGAAATACTGTTCTT	NA	40	119
pma-miR-200b-3p	TAATACTGCCTGGTAATGATGGT	NA	40	6
ola-miR-29c	TAGCACCATTTGAAATCG	mir-29	39	13
tgu-miR-9-3p	ATAAAGCTAGATAACCGAAAGT	NA	39	55
ssc-miR-361-3p	CCCCCAGGTGTGATTCTGATTTGC	NA	39	19
ccr-miR-21	TAGCTTATCAGACTGGTGTTGGC	mir-21	39	47
ggo-miR-491	AGTGGGGAACCCTTCCATGAGGA	mir-491	39	39
mml-miR-369-5p	AGATCGACCGTGTTATATTCGC	NA	39	14
ccr-miR-10d	TACCCTGTAGAACCGAATGTGT	mir-10	38	18
bta-miR-135a	TATGGCTTTTTATTCCTATGTGA	NA	38	46
xtr-miR-138	AGCTGGTGTTGTGAATC	mir-138	38	29
chi-miR-340-3p	TCCGTCTCAGTTACTTTATAGC	NA	38	15
pma-miR-203b-3p	GTGAAATGTTTAGGACCACTTG	NA	37	32
dre-miR-126b-3p	TCGTACCGTGAGTAATAGTGCA	NA	37	26
ggo-miR-495	AAACAAACATGGTGCACTTCT	mir-329	37	49
ssa-miR-19a-3p	TGTGCAAATCTATGCAAAACTG	NA	37	13
hsa-miR-30d-3p	CTTTCAGTCAGATGTTTGCTGC	NA	37	16
bta-miR-326	CCTCTGGGCCCTTCCTCCAG	mir-326	36	61
chi-miR-30a-3p	CTTTCAGTCGGATGTTTGCAG	NA	36	146
bta-miR-330	GCAAAGCACACGGCCTGCAGAGA	mir-330	36	22
dre-let-7d-5p	TGAGGTAGTTGGTTGTATGGTT	NA	35	26
bta-miR-2285l	AAAACCCGCATGAACTTTTTGGC	mir-2284	35	45
chi-miR-193b-5p	CGGGGTTTTGAGGGCGAGATGA	NA	35	14
chi-miR-24-5p	GTGCCTACTGAGCTGATATC	NA	35	56
bta-miR-132	TAACAGTCTACAGCCATGGTCG	mir-132	35	42
chi-miR-29b-5p	CTGGTTTCACATGGTGGCTTAGA	NA	34	24
tgu-miR-221-5p	ACCTGGCATACAATGTAGATTTCTGT	NA	34	11
bta-miR-494	TGAAACATACACGGGAAACCTC	mir-154	34	25
ggo-miR-532	CATGCCTTGAGTGTAGGACCG	mir-188	34	40
chi-miR-491-3p	CTTATGCAAGATTCCCTTCTAC	NA	34	21
ccr-miR-148	TCAGTGCATTACAGAACTTTGT	mir-148	33	26
hsa-miR-320c	AAAAGCTGGGTTGAGAGGGT	NA	33	83
dre-miR-455-3p	ATGCAGTCCATGGGCATATACAC	NA	33	90
sha-miR-26a	CCTATTCTTGATTACTTGTTT	mir-26	32	34
bta-miR-323	GCACATTACACGGTCGACCTCT	mir-154	32	36
bta-miR-138	AGCTGGTGTTGTGAATCAGGCCG	NA	32	9
ipu-miR-27c	TTCACAGTGGTTAAGTTCTG	mir-27	32	42
bta-miR-769	TGAGACCTCCGGGTTCTGAGCT	mir-769	32	38
ssa-let-7i-2-3p	CTGCGCAAGCTACTGCCTTGCC	NA	32	100
efu-miR-299	TGGTTTACCGTCCCACATACA	mir-299	31	12
chi-miR-190a-5p	TGATATGTTTGATATATTAGGTT	NA	31	37
bta-miR-153	TTGCATAGTCACAAAAGTGATC	NA	30	10
ssc-miR-432-5p	TCTTGGAGTAGGTCATTGGGT	NA	30	93
bta-miR-1271	CTTGGCACCTAGTAAGTACTCA	mir-1271	30	10
gga-miR-99a-3p	CAAGCTCGCTTCTATGGGTCT	NA	30	89
ssc-miR-296-5p	GAGGGCCCCCCCCAATCCTGT	NA	30	16
hsa-miR-20a-3p	ACTGCATTATGAGCACTTAAAG	NA	29	10
ipu-miR-27e	TTCACAGTGGCTAAGTTCAGT	mir-27	29	13
ggo-miR-505	GTCAACACTTGCTGGTTTCC	mir-505	28	20
chi-miR-331-5p	TCTAGGTATGGTCCCAGGGAT	NA	28	84
mml-miR-20a-3p	ACTGCATTATGAGCACTTAAAGT	NA	28	6
mml-miR-15b-3p	CGAATCATTATTTGCTGCTCTA	NA	28	3
chi-miR-335-3p	TTTTTCATTATTGCTCCTGACC	NA	27	92
chi-miR-96	TTTGGCACTAGCACATTTTTG	mir-96	27	9
pma-miR-30b	TGTAAACATCCCTGACTGGAAGCT	mir-30	27	23
chi-miR-136-5p	ACTCCATTTGTTTTGATGATGG	NA	27	31
aca-miR-199b-5p	CCCAGTGTTCGGACTACCTGT	NA	27	18
ola-miR-192-5p	TGACCTATGAATTGACAGCCA	NA	26	34
aca-miR-193-3p	AACTGGCCTACAAAGTCCCA	NA	26	72
bta-miR-340	TCCGTCTCAGTTACTTTATAGCC	mir-340	26	9
pma-miR-194-5p	TGTAACAGCAACTCCATGTGGAT	NA	26	17
chi-miR-29a-5p	ACTGATTTCTTTTGGTGTTCA	NA	26	28
chi-miR-301a-3p	CAGTGCAATAGTATTGTCAAAGC	NA	26	15
gga-miR-30e-3p	TTTCAGTCGGATGTTTACAGC	NA	26	34
gga-let-7k-5p	TGAGGTAGTAGATTGAATAGTT	NA	26	32
chi-miR-211	TTCCCTTTGTCATCCTTTGCCC	mir-204	26	87
mml-miR-129-2-3p	AAGCCCTTACCCCAAAAAGCA	NA	25	3
cgr-miR-2424	ACAGATCTTTGGTAATCTGATGGCT	NA	25	7
oan-miR-223-3p	TGTCAGTTTGTCAAATACCCTA	NA	25	1
oha-miR-148a-3p	TCAGTGCACTACAGAACTTTCT	NA	25	24
chi-miR-592	TTGTGTCAATATGCGATGATGT	mir-592	25	62
gga-miR-140-3p	CCACAGGGTAGAACCACGGAC	NA	25	60
ggo-miR-454	TAGTGCAATATTGCTTATAGGGTT	mir-454	24	21
pma-miR-128	TCACAGTGAACCGGTCTCTTTC	NA	24	48
pma-miR-199b-5p	CCCAGTGTTCTGACTACCTGTTC	NA	24	10
bta-miR-433	ATCATGATGGGCTCCTCGGTGT	mir-433	24	19
efu-miR-7b	TGGAAGACTAGTGATTTTGTTGTTT	mir-7	24	20
chi-miR-144-5p	TGGGATATCATCATATACTGT	NA	24	234
aca-miR-34b-5p	TGGCAGTGTCTTAGCTGGTTG	NA	23	14
cfa-miR-1468	CTCCGTTTGCCTGTTTTGCTGAT	mir-1468	23	38
oan-miR-214-5p	TGCCTGTCTACACTTGCTGT	NA	23	47
chi-miR-146b-3p	TGCCCTAGGGACTCAGTTCTGGT	NA	23	42
ssc-miR-299	ATGGTTTACCGTCCCACATAC	mir-299	23	3
xtr-miR-142-3p	TGTAGTGTTTCCTACTTTATGGA	NA	23	9
cgr-miR-151-3p	CTAGACTGAGGCTCCTTGAGG	NA	22	24
mmu-miR-362-5p	AATCCTTGGAACCTAGGTGTGAAT	NA	22	2
efu-miR-139	TGGAGACGCGGCCCTGTTGGAGT	mir-139	22	84
bta-miR-1839	AAGGTAGATAGAACAGGTCTTGTT	mir-1839	22	8
bta-miR-493	TGAAGGTCTACTGTGTGCCAGG	mir-493	22	15
cfa-miR-1343	CTCCTGGGGCCCGCACTCTCGCT	mir-1343	22	37
mmu-miR-1839-3p	AGACCTACTTATCTACCAACAGC	NA	22	59
efu-miR-34a	TGGCAGTGTCTTAGCTGGTTGTTG	mir-34	22	6
mdo-miR-30a-3p	TTTCAGTCGGATGTTTGCAGC	NA	22	79
chi-miR-543-3p	AAACATTCGCGGTGCACTTCT	NA	22	20
efu-miR-29a	CTAGCACCATCTGAAATCGGTTAT	mir-29	22	16
cte-miR-29a	TAGCACCATTTGAAATCAGTTT	mir-29	21	8
bta-miR-432	TCTTGGAGTAGGTCATTGGGTGG	mir-432	21	15
chi-miR-7-3p	AACAAATCACAGTCTGCCATA	NA	21	14
mmu-miR-10b-3p	CAGATTCGATTCTAGGGGAATA	NA	21	4
chi-miR-125a-3p	ACAGGTGAGGTTCTTGGGAGC	NA	21	50
mmu-miR-144-5p	GGATATCATCATATACTGTAAGT	NA	21	102
bta-miR-133a	TTTGGTCCCCTTCAACCAGCTG	NA	21	1456
chi-miR-30d-3p	TTTCAGTCAGATGTTTGCTGC	NA	21	4
isc-miR-96	TTTGGCACTAGCACATTTTTGT	mir-96	21	3
bta-miR-2483-3p	AAACATCTGGTTGGTTGAGAGA	NA	21	16
ssa-miR-125b-5p	TCCCTGAGACCCTTAACCTGTGA	NA	20	3
bta-miR-1185	AGAGGATACCCTTTGTATGTT	mir-154	20	11
efu-miR-128b	TCACAGTGAACCGGTCTCTTTTT	mir-128	20	48
mdo-miR-125b-1-3p	ACAGGTCAGGCTCTTGGGACCT	NA	20	30
bbe-miR-183-5p	TATGGCACTGGTAGAATTCACTGA	NA	20	2
ggo-miR-133b	TTTGGTCCCCTTCAACCAGC	mir-133	20	959
chi-miR-146a	TGAGAACTGAATTCCATAGGTT	mir-146	20	17
cgr-miR-409-5p	AGGTTACCCGAGCAACTTTGCATC	NA	19	12
hsa-miR-1306-5p	CCACCTCCCCTGCAAACGTCCA	NA	19	28
ggo-miR-432	TCTTGGAGTAGGTCATTGGGTG	mir-432	19	23
chi-miR-323a-3p	CACATTACACGGTCGACCTCT	NA	19	23
efu-miR-145	GTCCAGTTTTCCCAGGAATCCCTTA	mir-145	19	145
bta-miR-450b	TTTTGCAATATGTTCCTGAATA	mir-450	19	58
bta-miR-574	TGAGTGTGTGTGTGTGAGTGTGTG	NA	19	18
chi-miR-331-3p	CCCCTGGGCCTATCCTAGAAC	NA	19	24
mdo-miR-34a-3p	AATCAGCAAGTATACTGCCCTA	NA	19	3
mdo-miR-152-5p	AGGTTCTGTGATACACTCCGACT	NA	19	44
hsa-miR-24-1-5p	TGCCTACTGAGCTGATATCAGT	NA	19	37
efu-miR-30d	CTTTCAGTCAGATGTTTGCTGCT	mir-30	19	3
gga-miR-142-3p	TGTAGTGTTTCCTACTTTATGG	NA	18	9
eca-miR-125a-3p	ACAGGTGAGGTTCTTGGGAGCC	NA	18	19
xtr-miR-363-3p	AATTGCACGGTATCCATCTGT	NA	18	72
efu-let-7e	TGAGGTAGGAGGTTGTATAGTTGA	let-7	18	18
bta-miR-181d	AACATTCATTGTTGTCGGTGGGT	mir-181	18	32
oar-let-7d	AGAGGTAGTAGGTTGCATAG	let-7	18	26
mmu-miR-101b-3p	GTACAGTACTGTGATAGCT	NA	18	2
efu-miR-26b	TTCAAGTAATTCAGGATAGGTTGT	mir-26	17	11
chi-miR-451-5p	AAACCGTTACCATTACTGA	NA	17	556
ggo-miR-409	AGGTTACCCGAGCAACTTTGCA	mir-154	17	7
bta-miR-378c	ACTGGACTTGGAGTCAGAAGT	NA	17	27
mmu-miR-26a-2-3p	CCTGTTCTTGATTACTTGTTTC	NA	17	6
chi-miR-195-3p	CCAATATTGGCTGTGCTGCTC	NA	17	51
hsa-miR-660-3p	ACCTCCTGTGTGCATGGATTA	NA	17	4
cgr-miR-188	CATCCCTTGCATGGTGGAGG	mir-188	17	13
chi-miR-502b-5p	TAATTCTTGCTCCCCAGGTGAG	NA	17	5
chi-miR-671-3p	TCCGGTTCTCAGGGCTCCACC	NA	17	14
ssa-miR-25-3-5p	AGGCGGAGACTTGGGCAATTGCC	NA	17	26
sko-miR-92a	TATTGCACTTGTCCCGGCCTAA	mir-25	17	16
mdo-miR-29b-1-5p	GCTGGTTTCATATGGTGGTTTAGA	NA	16	9
chi-miR-98-3p	CTATACAACTTACTACTTTCCC	NA	16	25
eca-miR-148b-5p	GAAGTTCTGTTATACACTCAGG	NA	16	25
mml-miR-200c-5p	CGTCTTACCCAGCAGTGTTTGG	NA	16	1
oar-miR-323b	CCCAATACACGGTCGATCTCT	mir-154	16	7
chi-miR-154b-5p	AGAGGTCTTCCATGGTGCATTC	NA	16	13
chi-miR-33b-3p	CAGTGCCTCGGCAGTGCAGCC	NA	16	10
aca-miR-10c-5p	TACCCTGTAGAATCGAATTTGTG	NA	16	17
mml-miR-299-3p	TATGTGGGACGGTAAACCGCTT	NA	16	8
mdo-miR-17-3p	ACTGCAGTGAAGGCACTTGTA	NA	16	9
ola-miR-142	TCCATAAAGTAGAAAGCACTAC	mir-142	16	3
mml-miR-1296-5p	TTAGGGCCCTGGCTCCATCTCCT	NA	16	21
chi-miR-874-5p	CGGCCCCACGCACCAGGGTAAGA	NA	16	6
mdo-miR-195	TAGCAGCACAAAAATATTGGCA	mir-15	15	2
bta-miR-377	ATCACACAAAGGCAACTTTTGT	mir-154	15	10
efu-miR-210	AGCCACTGCCCACCGCACACTG	mir-210	15	3
chi-miR-133a-5p	AGCTGGTAAAATGGAACCAAAT	NA	15	282
bta-miR-30b-3p	CTGGGAGGTGGATGTTTACTT	NA	15	21
eca-miR-32	TATTGCACATTACTAAGTTGCA	mir-32	15	5
cfa-miR-421	ATCAACAGACATTAATTGGGCG	mir-95	15	15
cfa-miR-542	TGTGACAGATTGATAACTGAAA	mir-542	15	22
mmu-miR-378c	ACTGGACTTGGAGTCAGAAGC	NA	15	52
gga-miR-146b-5p	TGAGAACTGAATTCCATAGGCG	NA	15	23
mml-miR-320b	AAAAGCTGGGTTGAGAGGGCAA	mir-320	14	27
ipu-miR-152	TCAGTGCATGACAGAACTTTG	mir-148	14	15
chi-miR-130a-5p	GCTCTTTTCACATTGTGCTACT	NA	14	15
xtr-miR-125a	TCCCTGAGACCCTTAACCTGTG	mir-10	14	9
chi-miR-20b	CAAAGTGCTCACAGTGCAGGTAG	mir-17	14	6
bta-miR-99a-3p	CAAGCTCGCTTCTATGGGT	NA	14	38
efu-miR-125b	TCCCTGAGACCCTAACTTGTGAGG	mir-10	14	6
mdo-miR-206	TGGAATGTAAGGAAGTGTGTG	mir-1	14	1576
cin-miR-126-3p	TCGTACCGTGAGTAATAAAGC	NA	14	12
ola-miR-24c	TGGCTCAGTTCAGCAGAA	NA	14	5
bfl-miR-92c	TATTGCACTTGTCCCGGCTTGC	mir-25	13	22
bta-miR-504	AGACCCTGGTCTGCACTCTGTC	mir-504	13	41
hsa-miR-6516-3p	ATCATGTATGATACTGCAAACA	NA	13	3
bta-miR-2332	CGGTTTAAGGTCTTGGAGACAAAG	mir-2332	13	16
mml-miR-148b-5p	GAAGTTCTGTTATACACTCAGGCT	NA	13	4
bta-miR-7859	AAAAACTGGCAGCTTCATGTAA	NA	13	15
cgr-miR-1	TGGAATGTAAAGAAGTGTGTAT	mir-1	13	340
ssc-miR-382	AAGTTGTTCGTGGTGGATTCG	mir-154	13	4
ocu-miR-191-3p	GCTGCGCTTGGATTTCGTTCCC	NA	13	8
chi-miR-1307-5p	TCGACCGGACCTCGACC	NA	13	3
oan-miR-181b-5p	AACATTCATTGCTGTCGGTGG	NA	13	30
oan-miR-31-5p	AGGCAAGATGTTGGCATAGCTGT	NA	13	5
chi-miR-455-5p	TATGTGCCTTTGGACTACATCG	NA	13	32
dre-miR-10b-3p	ACAGATTCGATTCTAGGGGAGT	NA	13	3
hsa-miR-376c-5p	GGTGGATATTCCTTCTATGTT	NA	13	11
bta-miR-1388-5p	AGGACTGTCCAACCTGAGAAT	NA	13	18
ppy-miR-378d	ACTGGACTTGGAGTCAGA	NA	12	14
tgu-miR-103-5p	AGCTTCTTTACAGTGCTGCCTTGT	NA	12	8
cgr-miR-1839-3p	AGACCTACTTATCTACCAACAG	NA	12	11
efu-miR-133-3p	TTTGGTCCCCTTCAACCAGCTGTA	NA	12	411
rno-miR-24-1-5p	GTGCCTACTGAGCTGATATCAG	NA	12	27
mmu-miR-25-5p	AGGCGGAGACTTGGGCAATTGC	NA	12	15
bta-miR-370	GCCTGCTGGGGTGGAACCTGGT	mir-370	12	16
mml-miR-628-3p	TCTAGTAAGAGTGGCAGTCGA	NA	12	19
hsa-miR-33a-3p	CAATGTTTCCACAGTGCATCAC	NA	12	10
chi-miR-542-3p	TGTGACAGATTGATAACTGA	NA	12	28
hsa-miR-34a-3p	CAATCAGCAAGTATACTGCCCT	NA	12	2
dre-let-7h	TGAGGTAGTAAGTTGTGTTGTT	let-7	12	13
efu-miR-30b	TGTAAACATCCTACACTCTCAGCTG	mir-30	11	4
mmu-miR-132-5p	AACCGTGGCTTTCGATTGTTAC	NA	11	2
ola-miR-30e	CTTTCAGTCGGATGTTTGC	mir-30	11	58
pma-miR-16-5p	TAGCAGCACGTAAATATTGGAGT	NA	11	8
bbe-miR-29b-3p	TAGCACCATTTGAAATCAGTGCT	NA	11	7
mmu-miR-145a-3p	ATTCCTGGAAATACTGTTCTTG	NA	11	187
ssa-miR-194c-5p	TGTAACAGCAACTCCATATGGA	NA	11	9
pma-miR-30c-5p	TGTAAACATCCTCGACTGAAAGCT	NA	11	7
cfa-miR-330	TCTCTGGGCCTGTGTCTTAGGC	mir-330	11	14
dre-miR-1388-5p	AGGACTGTCCAACCTGAGAATG	NA	11	12
efu-miR-628	ATGCTGACATATTTACTAGAGGGT	mir-628	11	22
oar-miR-3956-5p	GTACGTGGATGCTGAAGGTCAGA	NA	11	6
chi-miR-330-3p	CAAAGCACACGGCCTGCAGAGA	NA	11	12
mdo-miR-10b-5p	ATACCCTGTAGAACCGAATTTGT	NA	11	14
ggo-miR-324	CGCATCCCCTAGGGCATTGGTG	mir-324	11	28
aae-miR-10	ACCCTGTAGATCCGAATTTGTT	mir-10	11	12
mmu-miR-136-3p	ATCATCGTCTCAAATGAGTCTT	NA	10	16
asu-miR-92-3p	TATTGCACTCGTCCCGGCCTGA	NA	10	4
efu-miR-409	CGAATGTTGCTCGGTGAACCCCTT	mir-154	10	12
oar-miR-154b-3p	AATCATACATGGTTGACCTTTTT	NA	10	4
hsa-miR-223-5p	CGTGTATTTGACAAGCTGAGTT	NA	10	0
rno-miR-452-3p	TCAGTCTCATCTGCAAAGAAG	NA	10	11
cgr-miR-23b-5p	GGGTTCCTGGCATGCTGATT	NA	10	14
ola-miR-194-5p	TGTAACAGCAACTCCATGT	NA	10	11
chi-miR-1307-3p	ACTCGGCGTGGCGTCGGTCGTGG	NA	10	34
mml-miR-412-5p	TGGTCGACCAGTTGGAAAGT	NA	10	11
tgu-miR-203-5p	AGTGGTTCTTAACAGTTCAAC	NA	10	0
chi-miR-193a	AACTGGCCCACAAAGTCCC	mir-193	10	23
ola-miR-193a	AACTGGCCTACAAAGTCCC	mir-193	10	51
mml-miR-181c-5p	AACATTCAACCTGTCGGTGAGT	NA	10	85
bta-miR-656	AATATTATACAGTCAACCTCT	mir-154	10	2
hsa-miR-31-3p	TGCTATGCCAACATATTGCCAT	NA	10	2
chi-miR-26a-3p	CCTATTCTCGGTTACTTGCACG	NA	10	4
bta-miR-329a	AACACACCTGGTTAACCTTTTT	mir-329	10	11
ipu-miR-18a	TAAGGTGCATCTAGTGCAGA	mir-17	10	16
gga-miR-490-5p	CCATGGATCTCCAGGTGGGT	NA	10	9
oar-miR-665-3p	ACCAGTAGGCCGAGGCCCCTCA	NA	10	4
bta-miR-2355-3p	ATTGTCCTTGCTGTTTGGAGAT	NA	10	10
pma-miR-9a-3p	TAAAGCTAGATAACCGAAAGTA	NA	10	12
mml-miR-30c-1-3p	TGGGAGAGGGTTGTTTACTCC	NA	9	5
gga-miR-455-3p	TGCAGTCCATGGGCATATACAC	NA	9	25
hsa-miR-99b-3p	CAAGCTCGTGTCTGTGGGTCCG	NA	9	17
dre-miR-27d	TTCACAGTGGCTAAGTTCTTCA	mir-27	9	1
bta-miR-376d	ATCATAGAGGAAAATCCACAT	mir-368	9	3
chi-miR-1271-5p	CTTGGCACCTAGTAAGTACT	NA	9	10
xtr-miR-150	TCTCCCAACCCTTGTACCAGAG	mir-150	9	7
bta-miR-365-5p	AGGGACTTTTGGGGGCAGATGTG	NA	9	2
chi-miR-30c-3p	CTGGGAGAGGGTTGTTTACTC	NA	9	12
ssc-miR-133b	TTTGGTCCCCTTCAACCAGCTAT	mir-133	9	668
cgr-miR-505-5p	GGGAGCCAGGAAGTATTGATGTT	NA	9	16
aca-miR-31-5p	AGGCAAGATGTTGGCATAGCT	NA	9	4
chi-miR-1814	GTTTTGTTTGGGTTTGTT	mir-1814	9	9
hsa-miR-378d	ACTGGACTTGGAGTCAGAAA	NA	9	10
bta-miR-671	AGGAAGCCCTGGAGGGGCTGGAG	mir-671	9	8
gga-miR-15b-5p	TAGCAGCACATCATGGTTTGCA	NA	9	1
tgu-miR-425-5p	AATGACACGATCACTCCCGCTG	NA	9	5
ggo-miR-376c	AACATAGAGGAAATTCCACG	mir-368	9	4
cfa-miR-493	TGAAGGTCTACTGTGTGCCAG	mir-493	9	4
bta-miR-485	AGAGGCTGGCCGTGATGAATTCG	mir-485	8	10
pma-miR-29a-3p	TAGCACCATTTGAAATCAGTTA	NA	8	5
chi-miR-99b-3p	CAAGCTCGTGTCTGTGGGTC	NA	8	17
chi-miR-34b-3p	AATCACTAGTTCCACTGCCATC	NA	8	20
bta-miR-23b-5p	GGGTTCCTGGCATGCTGATTT	NA	8	9
oar-miR-1185-5p	AGAGGATACCCTTTGTATGTTC	NA	8	16
aca-miR-200b-5p	CATCTTACTGGGCAGCATTG	NA	8	0
aca-miR-449a	TGGCAGTGTATTGTTAGCTGGA	mir-449	8	2
bta-miR-211	TTCCCTTTGTCATCCTTTGCC	mir-204	8	50
bta-miR-210	ACTGTGCGTGTGACAGCGGCTGA	mir-210	8	1
ssc-miR-30c-1-3p	CTGGGAGAGGGTTGTTTACT	NA	8	20
mdo-miR-15a-5p	TAGCAGCACATAATGGTTTGTT	NA	8	3
tgu-miR-15b-5p	TAGCAGCACATCATGGTTTGC	NA	8	3
bta-miR-487a	AATCATACAGGGACATCCAGT	mir-154	8	3
ssc-miR-190a	TGATATGTTTGATATATTAGG	mir-190	8	4
ccr-miR-19d	TGTGCAAACCCATGCAAAACTGA	mir-19	8	1
dre-miR-150	TCTCCCAATCCTTGTACCAGTG	mir-150	8	3
cgr-miR-331-5p	CTAGGTATGGTCCCAGGGATC	NA	8	14
rno-miR-532-5p	CATGCCTTGAGTGTAGGACTGT	NA	8	7
efu-miR-218a	TTGTGCTTGATCTAACCATGTGGTT	mir-218	8	5
mml-miR-200c-3p	AATACTGCCGGGTAATGATGGA	NA	8	0
cfa-miR-505	GGGAGCCAGGAAGTATTGATGT	mir-505	8	8
efu-miR-429	CTAATACTGTCTGGTAATGCCGT	mir-8	8	0
cfa-miR-10b	CCCTGTAGAACCGAATTTGTGT	mir-10	8	8
mdo-miR-455-3p	ATGCAGTCCATGGGCATATACA	NA	7	7
mmu-miR-378b	CTGGACTTGGAGTCAGAAGA	mir-378	7	5
ssc-miR-615	TCCGAGCCTGGGTCTCCCTCT	mir-615	7	16
oha-miR-146b-5p	TGAGAACTGAATTCCATAGGCTTT	NA	7	8
chi-miR-628-5p	ATGCTGACATATTTACTAGAGGG	NA	7	6
bta-miR-381	TATACAAGGGCAAGCTCTCTGT	mir-154	7	11
bta-miR-129	CTTTTTGCGGTCTGGGCTTGCT	NA	7	3
tgu-miR-30c-3p	CTGGGAGAAGGCTGTTTACTCT	NA	7	84
ssc-miR-345-5p	GCTGACTCCTAGTCCAGTGC	NA	7	16
bta-miR-490	CAACCTGGAGGACTCCATGCTG	mir-490	7	5
oan-let-7f-1-3p	CTATACAATCTATTGCCTTC	NA	7	9
ccr-miR-16c	TAGCAGCATGTAAATATTGGA	mir-15	7	0
cgr-miR-122	TGGAGTGTGACAATGGTGTTT	mir-122	7	269
xtr-miR-16b	TAGCAGCACGTAAATATTGGGT	mir-15	7	6
bta-miR-6123	TGCCAAGCCCACGTTCAAAGG	NA	7	14
bta-miR-486	TCCTGTACTGAGCTGCCCCGAG	mir-486	7	440
oan-miR-223-5p	CGTGTATTTGACAAGCTGAGTTG	NA	7	0
dre-miR-107b	AGCAGCATTGTACAGGGCTTT	mir-103	7	21
bta-miR-122	TGGAGTGTGACAATGGTGTTTG	mir-122	7	156
pma-miR-143-3p	TGAGATGAAGCACTGTAACTCC	NA	7	76
chi-miR-485-3p	AGTCATACACGGCTCTCCTCTCT	NA	7	5
lva-miR-92b-3p	TATTGCACTCGTCCCGGCCTGC	NA	7	29
xtr-let-7g	TGAGGTAGTTGTTTGTACAGT	let-7	7	5
chi-miR-155-3p	CTCCTACATGTTAGCATTAACA	NA	7	0
dre-miR-203a-5p	AGTGGTTCTTAACAGTTCAACAGT	NA	7	0
pma-miR-92a	TATTGCACTCGTCCCGGCCTTA	mir-25	7	3
mmu-miR-34a-3p	AATCAGCAAGTATACTGCCCT	NA	7	1
bta-miR-424-3p	CAAAACGTGAGGCGCTGCTAT	NA	7	10
chi-miR-671-5p	AGGAAGCCCTGGAGGGGCTGGAGG	NA	7	42
chi-miR-377	AATCACACAAAGGCAACTTTTG	mir-154	7	0
oan-let-7f-2-3p	CTATACAGTCTACTGTCTTTC	NA	7	6
cgr-miR-199a-5p	CCCAGTGTTCAGACTAGCTGTTC	NA	6	0
xtr-miR-122	TGGAGTGTGACAATGGTGTTTGT	mir-122	6	274
aca-miR-425-5p	AATGACACGATCACTCCCGCT	NA	6	9
efu-miR-7c	TGGAAGACTAGTGATTTTGTTGTTC	mir-7	6	9
rno-miR-127-5p	CTGAAGCTCAGAGGGCTCTGATT	NA	6	5
aca-miR-153-3p	TTGCATAGTCACAAAAGTGAT	NA	6	1
ssa-miR-203b-3p	TGAAATGTTTAGGACCACTCG	NA	6	0
gga-miR-10a-3p	AAATTCGTATCTAGGGGAATA	NA	6	0
chi-miR-412-5p	TGGTCGACCAGTTGGAAAGTAAT	NA	6	6
ggo-miR-592	TTGTGTCAATATGCGATGATG	mir-592	6	7
bta-miR-208b	ATAAGACGAACAAAAGGTTTGT	mir-208	6	58
rno-miR-376c-5p	GTGGATATTCCTTCTATGTTT	NA	6	5
mne-miR-197	TTCACCACCTTCTCCACCCGGC	mir-197	6	20
mml-miR-615-3p	TCCGAGCCTGGGTCTCCCTCTT	NA	6	12
aca-miR-99a-3p	CAAGCTCGCTTCTATGGGTC	NA	6	13
ssa-miR-146d-5p	TGAGAACTGAATTCCAAGGGTT	NA	6	14
dre-miR-193b-3p	AACTGGCCCGCAAAGTCCCGCT	NA	6	3
chi-miR-1271-3p	AGTGCCTGCTATGTGCCAGG	NA	6	19
cfa-miR-132	TAACAGTCTACAGCCATGGTCGC	mir-132	6	6
pmi-miR-92a-3p	TATTGCACTTGTCTCGGCCTGC	NA	6	4
chi-miR-93-3p	ACTGCTGAGCCAGCACTTCCCGA	NA	6	8
rno-miR-16-3p	ACCAATATTATTGTGCTGCTT	NA	6	11
aca-let-7i-3p	CTGCGCAAGCTACTGCCTTGCTA	NA	6	0
eca-miR-146b-3p	TGCCCTAGGGACTCAGTTCTGG	NA	6	7
cfa-miR-454	TAGTGCAATATTGCTTATAGGG	mir-454	6	5
mml-miR-331-5p	CTAGGTATGGTCCCAGGGATCC	NA	5	4
mdo-miR-29b-2-5p	GCTGGTTTCACATGGTGGCTTAGA	NA	5	7
gga-miR-34a-3p	CAATCAGCAAGTATACTGCCCTA	NA	5	1
bta-miR-133b	TTTGGTCCCCTTCAACCAGCTA	mir-133	5	229
cfa-miR-1296	TTAGGGCCCTGGCTCCATCTCCTTT	mir-1296	5	3
rno-miR-409a-3p	AATGTTGCTCGGTGAACCCC	NA	5	3
tgu-miR-34c-5p	AGGCAGTGTAGTTAGCTGATTGT	NA	5	20
chi-miR-18a-3p	ACTGCCCTAAGTGCTCCTTCTGG	NA	5	7
ssc-miR-194b-5p	TGTAACAGCGACTCCATGTGGA	NA	5	2
bta-miR-20b	CAAAGTGCTCACAGTGCAGGTA	mir-17	5	0
pma-miR-22b-3p	AAGCTGCCAGTTGAAGAGCTGA	NA	5	19
oan-miR-24-1-5p	TGCCTACTGAGCTGATATCA	NA	5	6
bta-miR-2424	AGATCTTTGGTAATCTGATGGCT	NA	5	5
oan-miR-143-5p	AGGTGCAGTGCTGCATCTCTGGT	NA	5	18
cgr-miR-322-5p	CAGCAGCAATTCATGTTTTGG	NA	5	11
efu-miR-486	TCCTGTACTGAGCTGCCCCGAGC	mir-486	5	127
efu-let-7d	AGAGGTAGTAGGTTGCATAGTTTT	let-7	5	6
pma-miR-20a-5p	CAAAGTGCTTATAGTGCAGGTAG	NA	5	2
tgu-miR-190-3p	ACTATATATCAAACATATTCCT	NA	5	3
pmi-miR-92d-3p	TATTGCACTCGTCCCGGCCTA	NA	5	8
bta-miR-146a	TGAGAACTGAATTCCATAGGTTGT	mir-146	5	2
tgu-let-7g-3p	CTGTACAGGCCACTGCCTTGC	NA	5	9
bta-miR-1343-3p	CTCCTGGGGCCCGCACTCTC	NA	5	2
ipu-miR-203a	AGTGGTTCTTAACAGTTCAACA	mir-203	5	1
efu-miR-181d	AACATTCATTGTTGTCGGTGGGTT	mir-181	5	13
chi-let-7g-3p	CTGTACAGGCCACTGCCTTGCC	NA	5	9
ppy-miR-199b-3p	ACAGTATTCTGCACATTGGTTA	NA	5	1
chi-miR-324-3p	ACTGCCCCAGGTGCTGCTGGG	NA	5	7
ggo-miR-760	CGGCTCTGGGTCTGTGGGGAG	mir-760	5	9
oar-miR-541-5p	AAAGGATTCTGCTGTCGGTCCCACT	NA	5	2
cfa-miR-211	TTCCCTTTGTCATCCTTTGCCT	mir-204	5	11
eca-miR-212	TAACAGTCTCCAGTCACGGCC	mir-132	5	3
ggo-miR-1306	ACGTTGGCTCTGGTGGTGATG	mir-1306	5	6
cfa-miR-106a	AAAGTGCTTACAGTGCAGGTAG	mir-17	5	1
eca-miR-655	ATAATACATGGTTAACCTCTTT	mir-154	5	2
gga-miR-301b-5p	GCTCTGACTTTATTGCACTACT	NA	4	7
tgu-miR-106-5p	AAAAGTGCTTACAGTGCAGGTAG	NA	4	6
mml-miR-382-3p	AATCATTCACGGACAACACTTTT	NA	4	0
chi-miR-29c-3p	TAGCACCATTTGAAATTGGTT	NA	4	4
chi-miR-301b	CAGTGCAATGATATTGTCAAAGC	mir-130	4	0
bta-miR-338	TCCAGCATCAGTGATTTTGTTGA	mir-338	4	12
bta-miR-27a-5p	AGGGCTTAGCTGCTTGTGAGCA	NA	4	7
mmu-miR-139-3p	TGGAGACGCGGCCCTGTTGGAG	NA	4	11
chi-miR-20a-3p	ACTGCATTATGAGCACTTAAA	NA	4	1
mml-miR-106b-3p	ACCGCACTGTGGGTACTTGCTG	NA	4	4
chi-miR-329a-3p	AACACACCTGGTTAACCTTT	NA	4	2
bta-miR-6516	TTTGCAGTAACAGGTGTGAAC	mir-6516	4	4
chi-miR-219	TGATTGTCCAAACGCAATTCT	mir-219	4	0
cfa-miR-377	AGAGGTTGCCCTTGGTGAATTC	mir-154	4	3
bta-miR-455-5p	TATGTGCCTTTGGACTACATC	NA	4	2
pma-miR-30g	TGTAAACATCCTTCACTCTCAGC	mir-30	4	1
bta-miR-2404	TTGCACTGCATGGTATCTGC	NA	4	3
rno-miR-188-3p	CTCCCACATGCAGGGTTTGC	NA	4	2
chi-miR-195-5p	TAGCAGCACAGAAATGTTGG	NA	4	2
oar-miR-134-5p	TGTGACTGGTTGACCAGAGGG	NA	4	3
xtr-miR-18a-3p	ACTGCCCTAAGTGCTCCTTCT	NA	4	8
bta-miR-3432a	TGCGGGATCTTTAGTTGTGGTG	NA	4	8
bta-miR-1291	TGGCCCTGACTGAAGACCTGCAGT	mir-1291	4	9
cgr-miR-744-3p	CTGTTGCCACTAACCTCAACC	NA	4	3
xtr-miR-93a	AAAGTGCTGTTCGTGCAGGTAG	mir-17	4	11
fru-miR-30c	TGTAAACATCCTACACTCTCGG	mir-30	4	5
bta-miR-376c	GTGGATATTCCTTCTATGTTTA	mir-368	4	1
rno-miR-98-3p	CTATACAACTTACTACTTTCC	NA	4	19
eca-miR-3613	ACAAAAAAAAAAGCCCAACCCTT	mir-3613	4	0
hsa-miR-10a-3p	CAAATTCGTATCTAGGGGAATA	NA	4	0
tgu-miR-153-1-5p	GTCATTTTTGTGATGTTGCAGCT	NA	4	0
efu-miR-103a	AGCAGCATTGTACAGGGCTATGAAG	mir-103	4	0
sha-miR-204	GCTGGGAAGGCAAAGGGACGT	mir-204	4	4
pma-miR-30d	TGTAAACATCCACGACTGGAAGCT	mir-30	4	8
chi-miR-124a	TAAGGCACGCGGTGAATGCC	mir-124	4	9
sko-miR-1-3p	TGGAATGTAATGAAGTATGTAT	NA	4	37
tni-miR-142b	CATAAAGTAGAAAGCACTACTA	mir-142	4	0
bta-miR-212	ACCTTGGCTCTAGACTGCTTACT	mir-132	4	7
dre-miR-30a-5p	TGTAAACATTCCCGACTGGAAG	NA	4	5
bta-miR-6517	TCAGGGTCCGTGAGCTCCTCGGC	NA	4	0
gga-miR-133a-5p	AGCTGGTAAAATGGAACCAAATC	NA	4	25
oan-miR-24-2-5p	GTGCCTACTGAGCTGAAACGCAGT	NA	4	0
mmu-miR-212-3p	TAACAGTCTCCAGTCACGGCCA	NA	4	2
hsa-miR-205-3p	GATTTCAGTGGAGTGAAGTTC	NA	4	1
chi-miR-1248-5p	ACCTTCTTGTATAAGCACTG	NA	4	5
ggo-miR-485	AGAGGCTGGCCGTGATGAAT	mir-485	4	7
ssa-miR-150-5p	TCTCCCAATCCTTGTACCAGT	NA	4	4
efu-miR-9-3p	ATAAAGCTAGATAACCGAAAGTA	NA	4	4
efu-miR-25	CATTGCACTTGTCTCGGTCTGACA	mir-25	4	1
tgu-miR-30d-3p	TTTCAGTCAGATGTTTGCTGCA	NA	4	1
bta-miR-2387	TGGAAGGCCTGGCTTTGCAGCG	mir-2387	4	3
mdo-let-7a-3p	CTGTACAGCCTCCTAGCTTTCC	NA	4	2
api-miR-29	TAGCACCATTTGAAACCAGT	mir-29	4	3
xtr-miR-146b	TGAGAACTGAATTCCATGGACT	mir-146	4	52
sha-miR-21	TAGCTTATCAGACTGATGTTGACTG	mir-21	4	2
cfa-miR-6516	TTTGCAGTAACAGGTGTGAACATTC	mir-6516	4	0
ola-miR-200a	AACACTGTCTGGTAACGA	mir-8	3	0
cgr-miR-455-3p	GCAGTCCACGGGCATATACACT	NA	3	4
eca-miR-503	TAGCAGCGGGAACAGTACTGCAG	mir-503	3	1
chi-miR-106a-3p	TACTGCAATGCAAGCACTTCTT	NA	3	2
hsa-miR-3607-3p	ACTGTAAACGCTTTCTGATG	NA	3	4
dre-miR-138-5p	AGCTGGTGTTGTGAATCAGGCC	NA	3	0
bta-miR-885	TCCATTACACTACCCTGCCTCT	mir-885	3	42
xtr-miR-210	CTGTGCGTGTGACAGCGGCTAA	mir-210	3	1
mmu-miR-361-3p	TCCCCCAGGTGTGATTCTGATTTGT	NA	3	2
rno-miR-218a-1-3p	AAACATGGTTCCGTCAAGCAC	NA	3	1
asu-miR-100a-5p	AACCCGTAGATCCGAACTTGTGTT	NA	3	5
bta-miR-1307	ACTCGGCGTGGCGTCGGTCGTG	mir-1307	3	17
tgu-miR-29a-1-5p	ACTGATTTCTTTTGGTGTTCAGA	NA	3	3
efu-miR-181a	AACCATCGACCGTTGATTGTACC	mir-181	3	2
xla-miR-133d	TTGGTCCCCTTCAACCAGCCGC	mir-133	3	98
chi-miR-483	CACTCCTCTCCTCCCGTCTTCT	mir-483	3	9
mml-miR-92b-5p	AGGGACGGGACGCGGTGCAGTGTT	NA	3	0
chi-miR-134	TGTGACTGGTTGACCAGAGGGG	mir-134	3	2
mmu-miR-378d	ACTGGCCTTGGAGTCAGAAGGT	NA	3	3
bta-miR-29d-3p	TAGCACCATTTGAAATCGATTA	NA	3	1
xtr-miR-10c	CACCCTGTAGAATCGAATTTGT	mir-10	3	2
rno-miR-345-3p	CCCTGAACTAGGGGTCTGGAGA	NA	3	3
hsa-miR-2355-5p	ATCCCCAGATACAATGGACAA	NA	3	5
ppy-miR-382	GAAGTTGTTCGTGGTGGATTCC	mir-154	3	5
mml-miR-590-3p	TAATTTTATGTATAAGCTGGT	NA	3	0
chi-miR-449a-5p	TGGCAGTGTATTGTTAGCTGG	NA	3	1
chi-miR-485-5p	AGAGGCTGGCCGTGATGAATTC	NA	3	7
bta-miR-452	TGTTTGCAGAGGAAACTGAGAC	mir-452	3	4
mdo-miR-497-3p	CAAACCACACTGTGGTGTTAGA	NA	3	0
ssc-miR-652	ACAACCCTAGGAGAGGGTGCCATTCA	mir-652	3	0
oar-miR-758-5p	TGGTTGACCAGAGAGCACACG	NA	3	0
bta-miR-502a	AATGCACCTGGGCAAGGATTCA	NA	3	4
tgu-miR-200b-5p	ATCTTACTGGGCAGCATTGGA	NA	3	0
ssc-miR-345-3p	CCCTGAACTAGGGGTCTGGAG	NA	3	6
hsa-miR-500a-3p	ATGCACCTGGGCAAGGATTCTG	NA	3	5
oan-miR-23b-3p	ATCACATTGCCAGGGATAACCA	NA	3	0
mml-miR-127-5p	TGAAGCTCAGAGGGCTCTGATT	NA	3	1
oan-miR-499-5p	TTAAGACTTGTAGTGATGTTT	NA	3	33
oan-miR-20a-5p	TAAAGTGCTTATAGTGCAGG	NA	3	0
sha-miR-30e	TGTAAACATCCTTGACTGGAAGCTG	mir-30	3	1
cgr-miR-146b-3p	GCCCTAGGGACTCAGTTCTGGT	NA	3	10
efu-miR-26c	TTCAAGTAATCCAGGATAGGCTGTT	mir-26	3	5
rno-miR-421-3p	ATCAACAGACATTAATTGGG	NA	3	0
hsa-miR-1468-5p	CTCCGTTTGCCTGTTTCGCTG	NA	2	4
isc-miR-71	TGAAAGACATGGGTAGTGAGATG	mir-71	2	1
bbe-miR-200c-3p	TAACACTGTCTGGTAATGATGA	NA	2	0
rno-miR-450a-5p	TTTTGCGATGTGTTCCTAATGT	NA	2	6
tgu-miR-17a-3p	ACTGCAGTGAAGGCACTTGTAG	NA	2	0
cgr-miR-138	AGCTGGTGTTGTGAATCAGGC	mir-138	2	2
bta-miR-582	TTACAGTTGTTCAACCAGTTACT	mir-582	2	1
ipu-miR-737	GTTTTTTTAGGTTTTGATTTTT	mir-737	2	3
bta-miR-1434-3p	GAAGAAATCTAAGGTCTGAGG	NA	2	3
mml-miR-500a-3p	ATGCACCTGGGCAAGGATTCTGA	NA	2	12
hsa-miR-127-5p	CTGAAGCTCAGAGGGCTCTGAT	NA	2	3
chi-miR-127-5p	GAAGCTCAGAGGGCTCTGATTC	NA	2	0
mdo-miR-22-5p	AGTTCTTCAGTGGCGAGCTTTA	NA	2	6
oha-miR-10c-5p	TACCCTGTAGAACCGAATTTGTGTG	NA	2	4
efu-miR-330	GCAAAGCACACGGCCTGCAGAGAGG	mir-330	2	4
bta-miR-760-3p	CGGCTCTGGGTCTGTGGGGA	NA	2	3
chi-miR-154b-3p	ATCATACATGGTTGACCTTTTTT	NA	2	0
oha-miR-100-5p	AACCCGTAGATCCGAACTTGTGCT	NA	2	1
oan-miR-30d-3p	CTTTCAGTCAGATGTTTGCTAC	NA	2	2
odi-miR-92a	TATTGCACTCGTCCCGGCCTTG	NA	2	0
mdo-miR-18a-3p	ACTGCCCTAAGTGCTCCTTCTGGC	NA	2	1
pmi-miR-200-3p	TAATACTGTCTGGTAATGATGT	NA	2	0
chi-miR-496-3p	TGAGTATTACATGGCCAATCT	NA	2	2
ccr-miR-27c-3p	TTCACAGTGGTTAAGTTCTGCC	NA	2	5
dre-miR-101b	TACAGTACTATGATAACTGAAG	mir-101	2	0
bta-miR-664a	CAGGCTGGGGTGTGTGTGGATG	mir-664	2	0
bta-miR-193a-3p	AACTGGCCTACAAAGTCCCAGT	NA	2	17
bta-miR-18a	TAAGGTGCATCTAGTGCAGATA	mir-17	2	2
chi-miR-100-3p	CAAGCTTGTGTCTATAGGTAT	NA	2	4
xtr-miR-30a-3p	CTTTCAGTCAGATGTTTGCAGC	NA	2	0
hsa-miR-378g	ACTGGGCTTGGAGTCAGAAG	NA	2	1
rno-miR-107-5p	AGCTTCTTTACAGTGTTGCCTTGT	NA	2	0
rno-miR-196b-3p	TCGACAGCACGACACTGCCTTCA	NA	2	4
oar-miR-655-5p	AGAGGTTATCCGTGTTATGTTC	NA	2	0
mdo-miR-129-3p	AAGCCCTTACCCCAAAAAGTA	NA	2	0
chi-miR-33b-5p	GTGCATTGCTGTTGCATTG	NA	2	0
bfl-miR-133	TGGTCCCCTTCAACCAGCTGTA	mir-133	2	121
ggo-miR-320b	AGAAGCTGGGTTGAGAGGGCAA	mir-320	2	0
oan-miR-129-3p	AAGCCCTTACCCCAAAAAGT	NA	2	1
mmu-miR-322-5p	CAGCAGCAATTCATGTTTTGGA	NA	2	2
bta-miR-219	AGAGTTGAGTCTGGACGTCCCG	NA	2	1
hsa-miR-744-3p	CTGTTGCCACTAACCTCAACCT	NA	2	6
hsa-miR-99a-3p	CAAGCTCGCTTCTATGGGTCTG	NA	2	5
gga-miR-18a-3p	ACTGCCCTAAGTGCTCCTTCTG	NA	2	8
tgu-miR-139-5p	TCTACAGTGCATGTGTCTCCAGT	NA	2	10
aae-miR-124	TAAGGCACGCGGTGAATGC	mir-124	2	6
ssa-let-7h-3p	CTATACAACTTACTGCCTTCCT	NA	2	0
chi-miR-301a-5p	GCTCTGACTTTATTGCACTAC	NA	2	4
gga-miR-144-5p	GGATATCATCATATACTGTAAG	NA	2	31
bta-miR-665	ACCAGTAGGCCGAGGCCCCT	mir-665	2	1
ssc-miR-9851-3p	TGGCACCAGCACTGGCGGTGGC	NA	2	0
ggo-miR-655	ATAATACATGGTTAACCTCTT	mir-154	2	0
cfa-miR-380	TATGTAATATGGTCCACGTCT	mir-379	2	0
rno-miR-874-5p	CGGCCCCACGCACCAGGGTAA	NA	2	7
bta-miR-411b	TGGTCGACCATAAAACGTACGT	mir-379	2	6
bta-miR-1434-5p	GTACATGATGACTAAAATTTCT	NA	2	1
bta-miR-190b	TGATATGTTTGATATTGGGTT	mir-190	2	2
ipu-miR-133c	TTTGGTCCCTTTCAACCAGCT	mir-133	2	38
rno-miR-27b-5p	AGAGCTTAGCTGATTGGTGAACAG	NA	2	5
mmu-miR-874-5p	CGGCCCCACGCACCAGGGTAAG	NA	2	5
bta-miR-1248	ACCTTCTTGTATAAGCACTGTGCTAAA	NA	2	1
cgr-miR-190a	TGATATGTTTGATATATTAGGTTG	mir-190	2	1
hsa-miR-551b-5p	GAAATCAAGCGTGGGTGAGACC	NA	2	0
bta-miR-187	TCGTGTCTTGTGTTGCAGCCGG	mir-187	2	1
mdo-miR-150-5p	TCTCCCAACCCTTGTACCAGAGT	NA	2	1
chi-miR-1185-3p	ATATACAGAGGGAGACTCTTAT	NA	2	1
isc-miR-315	TTTTGATTGTTGCTCAGAAGGC	mir-315	2	0
bfl-miR-200c	TAACACTGTCTGGTAATGATG	mir-8	2	0
ccr-miR-203b-5p	AGTGGTTCTTAACAGTTCAACAG	NA	2	0
pma-miR-133b-3p	TTTGGTCCCCTTCAACCAGCTC	NA	2	55
oan-miR-181c-5p	AACATTCATTACTGTCGGTGGGT	NA	2	1
efu-miR-381	ATATACAAGGGCAAGCTCTCTGT	mir-154	2	0
hsa-miR-24-2-5p	TGCCTACTGAGCTGAAACACAG	NA	2	1
chi-miR-496-5p	GAGTCGGGTACTCGAATGGA	NA	2	1
rno-miR-411-3p	TATGTAACACGGTCCACTAA	NA	2	1
hsa-miR-23a-5p	GGGGTTCCTGGGGATGGGATTT	NA	2	2
ola-miR-301b-3p	CAGTGCAATAGTATTGTC	NA	2	3
xtr-miR-16c	TAGCAGCACGTAAATACTGGAG	mir-15	2	3
efu-miR-30c	CTGGGAGAGGGTTGTTTACTCCT	mir-30	2	2
pma-miR-375a-3p	TTTGTTCGTTCGGCTCGCGTTA	NA	2	2
ssa-miR-144-5p	GGATATCATCATATACTGTAAGTT	NA	2	1
chi-miR-190b	TGATATGTTTGATATTGGGTTG	mir-190	2	13
pma-miR-31	TGGCAAGATGCTGGCATAGCC	mir-31	2	0
mmu-miR-155-5p	TTAATGCTAATTGTGATAGGGGT	NA	2	1
efu-miR-30e	GCTTTCAGTCGGATGTTTACAGC	mir-30	2	7
mmu-miR-452-3p	TCAGTCTCATCTGCAAAGAGGT	NA	2	0
cfa-miR-6529	CCTGTGCCTTTTACCTCTTTAA	mir-6529	2	2
hsa-miR-3653-3p	CTAAGAAGTTGACTGAAG	NA	2	2
aca-miR-99b-5p	AACCCGTAGATCCGAACTTGCGG	NA	2	1
gga-miR-103-2-5p	AGCTTCTTTACAGTGCTGCCTTG	NA	2	1
tgu-miR-15c-5p	TAGCAGCACATCATGGTTTGT	NA	2	4
mmu-miR-218-1-3p	AAACATGGTTCCGTCAAGCACC	NA	2	0
efu-miR-219	TGATTGTCCAAACGCAATTCTCG	mir-219	2	12
oan-let-7g-3p	CTGTACAGGCCACTGCCTTG	NA	2	2
mdo-miR-193a-5p	TGGGTCTTTGTGGGCGAGATGA	NA	2	0
eca-miR-9182	TTGCACAAAGAGTCTCATGTCT	NA	2	3
cgr-miR-32-3p	CAATTTAGTGTGTGTGATATT	NA	2	1
gga-miR-101-2-5p	TCAGTTATCACAGTGCTGATGCT	NA	2	3
bta-miR-346	TGTCTGCCCGCATGCCTGCCTCT	mir-346	2	5
mmu-miR-128-1-5p	CGGGGCCGTAGCACTGTCTGA	NA	2	2
rno-miR-379-3p	CTATGTAACATGGTCCACTAAC	NA	2	0
ggo-miR-328	CTGGCCCTCTCTGCCCTTCCG	mir-328	2	5
xtr-miR-199b	CCCAGTGTTCAGACTACGTGTTC	mir-199	2	2
ssc-miR-7857-3p	ATTGTTCTCCAACCTGGCTCTT	NA	1	3
hsa-miR-148b-5p	AAGTTCTGTTATACACTCAGGC	NA	1	1
mml-miR-378d	ACTGGACTTGGAGTCAGAAGCA	mir-378	1	4
ccr-miR-144	CTACAGTATAGATGATGTACT	mir-144	1	19
oan-miR-15b-3p	CGAATCATTATTTGCTGCTTT	NA	1	1
gga-miR-1306-3p	TGGACGTTGGCTCTGGTGGTGAT	NA	1	2
ccr-miR-15a	TAGCAGCACAGAATGGTTTGT	NA	1	1
hsa-miR-1260b	ATCCCACCACTGCCACCAT	mir-1260b	1	0
tgu-miR-16a-3p	CCAGTATTAACTGTGCTGCTGA	NA	1	0
aca-miR-212-5p	ACCTTGGCTCTAGACTGCTTAC	NA	1	2
aca-miR-129b-5p	CTTTTTGCGGTCTGGGCTTT	NA	1	1
hsa-miR-125b-2-3p	TCACAAGTCAGGCTCTTGGGAC	NA	1	1
mmu-miR-376a-5p	GGTAGATTCTCCTTCTATGAGT	NA	1	0
rno-miR-378b	AGTGGACTTGGAGTCAGAAGG	NA	1	1
ola-miR-17	CAAAGTGCTTACAGTGCA	mir-17	1	1
ccr-miR-18b	TAAGGTGCATTTAGTGCAGATAG	mir-17	1	0
rno-miR-194-3p	CCAGTGGGGCTGCTGTTATCT	NA	1	0
oar-miR-381-3p	ATATACAAGGGCAAGCTCTCT	NA	1	2
mmu-miR-6516-3p	TCATGTATGATACTGCAAACAG	NA	1	1
mdo-miR-199b-3-5p	CCAGTGTTCAGACTACCTGTCC	NA	1	3
aca-miR-24-2-5p	TGCCTACTGAGCTGATATCAG	NA	1	3
ipu-miR-27d	TTCACAGTGGCTAAGTTCTTCAC	mir-27	1	0
rno-miR-103-1-5p	GGCTTCTTTACAGTGCTGCCTTGT	NA	1	0
ola-miR-181a-3p	ACCATCGACCGTTGACTGTAC	NA	1	0
ggo-miR-1343	CTCCTGGGGCCCGCACTC	mir-1343	1	2
gga-let-7d	AGAGGTAGTGGGTTGCATAGT	let-7	1	4
ssa-miR-26a-3p	CCTATTCTCGATTACTTGTTTC	NA	1	0
hsa-miR-33b-3p	CAGTGCCTCGGCAGTGCAGCCC	NA	1	0
ssa-miR-130d-3p	CAGTGCAATATTAAAAGGGCA	NA	1	2
hsa-miR-4497	CTCCGGGACGGCTGGGC	NA	1	1
bta-miR-142-3p	AGTGTTTCCTACTTTATGGATG	NA	1	0
hsa-miR-431-3p	CAGGTCGTCTTGCAGGGCTTCT	NA	1	1
mml-miR-302a-5p	TAAACGTGGATGTACTTGCTTT	NA	1	0
ggo-miR-433	ATCATGATGGGCTCCTCGGTG	mir-433	1	2
ccr-miR-146a	TGAGAACTGAATTCCATAGATGG	mir-146	1	0
ipu-miR-196d	TAGGTAGTTTTATGTTGTTGGGC	NA	1	0
bta-miR-1298	TTCATTCGGCTGTCCAGATGTA	mir-1298	1	0
mmu-miR-374c-5p	ATAATACAACCTGCTAAGTG	NA	1	0
mdo-miR-20a-3p	ACTGCATTATGAGCACTTGAAGT	NA	1	1
mmu-miR-758-3p	TTTGTGACCTGGTCCACTA	NA	1	0
hsa-miR-29a-5p	ACTGATTTCTTTTGGTGTTCAG	NA	1	1
odi-let-7d	TGAGGTAGTGGGTTGTATCGCT	NA	1	0
mdo-miR-26-2-3p	CCTGTTCTCCATTACTTGGTTC	NA	1	1
ola-miR-19d	TGTGCAAACCCATGCAAAACTG	mir-19	1	3
tgu-miR-29b-1-5p	CTGGTTTCATATGGTGGTTTAGA	NA	1	3
bta-miR-135b	TATGGCTTTTCATTCCTATGTGA	mir-135	1	0
chi-miR-326-5p	CCTCGTCTGTCTGTTGGGCT	NA	1	2
gga-miR-34c-3p	AATCACTAACCACACAGCCAGG	NA	1	0
hsa-miR-194-3p	CCAGTGGGGCTGCTGTTATCTG	NA	1	0
tgu-miR-29a-2-5p	TGACCGATTTCTCTTGGTGTTC	NA	1	2
sha-miR-181a-3p	ACCATCGACCGTTGATTGT	NA	1	6
tch-miR-147b	GTGTGCGGAAATGCTTCTGCT	mir-147	1	0
api-miR-263b	CTTGGCACTGGAAGAATTCACAGA	mir-263	1	2
cfa-miR-384	ATTCCTAGAAATTGTTCACAAT	mir-384	1	0
cfa-miR-345	CCTGAACTAGGGGTCTGGAGG	mir-345	1	1
hsa-miR-196b-3p	TCGACAGCACGACACTGCCTTC	NA	1	9
dre-miR-125b-1-3p	ACGGGTTAGGTTCTTGGGAGCT	NA	1	0
cfa-miR-491	CTTATGCAAGATTCCCTTCTA	mir-491	1	2
cfa-miR-181b	AACATTCATTGCTGTCGGTG	NA	1	12
chi-miR-154a-3p	AATCATACACGGTTCACCTACT	NA	1	0
oha-miR-30d-3p	CTTTCAGTCCGATGTTTGCTGC	NA	1	0
efu-miR-323	GCACATTACACGGTCGACCTCTT	mir-154	1	0
ggo-miR-203b	TTGAACTGTTAAGAACCACTGG	mir-203	1	1
mmu-miR-193a-5p	TGGGTCTTTGCGGGCAAGATGA	NA	1	0
mne-miR-187	TCGTGTCTTGTGTTGCAGCCG	mir-187	1	0
ggo-miR-370	GCCTGCTGGGGTGGAACCTGGTC	mir-370	1	0
efu-miR-1307	TCGACCGGACCTCGACCGGCTCGT	mir-1307	1	0
oar-miR-376b-3p	ATCATAGAGGAAAATCCATGT	NA	1	0
ola-miR-106a	TAAAGTGCTTACAGTGCAGGT	mir-17	1	1
bta-miR-449c	AGGCAGTGCATCTCTAGCTGG	mir-449	1	1
bta-miR-34c	AGGCAGTGTAGTTAGCTGATTG	mir-34	1	0
cfa-miR-369	AATAATACATGGTTGGTCTTT	mir-154	1	1
dre-miR-196d	TAGGTAGTTTTATGTTGTTGGG	mir-196	1	0
pma-miR-181a-3p	ACCATCGACCGTTGACTGTACC	NA	1	1
cin-miR-155	TTAATGCTAATAGTGATAGGG	NA	1	0
tgu-miR-122-3p	AACGCCATTATCACACTAAAT	NA	1	5
tgu-miR-29b-2-5p	TGGTTTCACATGGTGGCTTAGA	NA	1	0
cfa-miR-28	CACTAGATTGTGAGCTCCTGGA	mir-28	1	2
mmu-miR-29b-1-5p	GCTGGTTTCATATGGTGGTTTA	NA	1	2
dme-miR-263a-5p	AATGGCACTGGAAGAATTCACGGG	NA	1	0
hhi-miR-196	TAGGTAGTCTCATGTTGTTGGG	mir-196	1	4
ggo-miR-18b	TAAGGTGCATCTAGTGCAGT	mir-17	1	0
ggo-miR-524-5p	CTACAAAGGGAAGCACTTTCTC	NA	1	0
hsa-miR-3195	CGCGCCGGGCCCGGGTT	NA	1	0
bta-miR-154a	TAGGTTATCCGTGTAGCCTTCG	mir-154	1	3
cin-miR-199-3p	ACAGTAGTCTGCACATTGGGTG	NA	1	0
efu-miR-107	AGCAGCATTGTACAGGGCTATCAAA	mir-103	1	1
dre-miR-10d-5p	TACCCTGTAGAACCGAATGTGTG	NA	1	1
chi-miR-493-5p	TTGTACATGGTAGGCTTTCATT	NA	1	0
sha-miR-352	ATCTCAGGTTTGTCAGCCCAT	NA	1	0
eca-miR-324-3p	CCACTGCCCCAGGTGCTGCTGG	NA	1	0
rno-miR-380-3p	TATGTAGTATGGTCCACATCT	NA	1	0
odi-miR-31	AGGCAAGATGCTGGCATTGCTG	NA	1	0
bta-miR-302d	TAAGTGCTTCCATGTTTTAGT	mir-302	1	1
mmu-miR-365-2-5p	AGGGACTTTCAGGGGCAGCTGTG	NA	1	2
dre-miR-2188-5p	AAGGTCCAACCTCACATGTCC	NA	1	2
hsa-miR-432-3p	CTGGATGGCTCCTCCATGTCT	NA	1	0
mml-miR-431	TGTCTTGCAGGCCGTCATGCA	mir-431	1	0
oar-miR-487b-5p	AGTGGTTATCCCTGTCCTGTTC	NA	1	1
bta-miR-301a	CAGTGCAATAGTATTGTCAAAGCAT	mir-130	1	0
bta-miR-147	GTGTGCGGAAATGCTTCTGCTA	mir-147	1	0
odi-miR-1c	TGGAATGTAAAGAAGTATGTGA	mir-1	1	28
oar-miR-370-3p	GCCTGCTGGGGTGGAACCTGGTCT	NA	1	0
oan-miR-153-1-5p	GTCATTTTTGTGATCTGCAGCT	NA	1	0
mmu-miR-302c-3p	AAGTGCTTCCATGTTTCAGTGG	NA	1	0
gga-miR-124c-3p	TCAAGGTCCGCTGTGAACACGG	NA	1	2
bta-miR-2285t	AGAATCTGGATGAACTTTTTGG	mir-2284	1	0
mmu-miR-299b-3p	TATGTGGGACGGTAAACC	NA	1	1
sha-miR-150	TCTCCCAACCCTCGTACCA	mir-150	1	0
ssa-miR-7a-3-3p	CAACAAATCACAGTCTGCCAAA	NA	1	0
hsa-miR-6506-5p	ACTGGGATGTCACTGAATATGGT	NA	1	0
chi-miR-147-5p	TGGAAACACTTCTGCACAAACT	NA	1	0
bta-miR-376a	ATCATAGAGGAAAATCCACGT	mir-368	1	3
dre-miR-218b	TTGTGCTTGATCTAACCATGCA	mir-218	1	0
mdo-miR-101-2-5p	TCGGTTATCATGGTACCGATGCT	NA	1	0
bta-miR-296-5p	GAGGGCCCCCCCCAATCCT	NA	1	0
hsa-miR-219b-5p	AGATGTCCAGCCACAATTCTCG	NA	1	0
ola-miR-101b-3p	GTACAGTACTATGATAACT	NA	1	2
mmu-miR-224-5p	TAAGTCACTAGTGGTTCCGTT	NA	1	1
chi-miR-1839	AAGGTAGACAGAACAGGTCTTG	mir-1839	1	0
ppy-miR-199b-5p	GTGTTTAGACTATCTGTTC	NA	1	0
mml-miR-516b	ATCTGGAGGTAAGAAGCACTTT	mir-515	1	0
oar-miR-758-3p	TTTGTGACCTGGTCCACTAA	NA	1	1
hsa-miR-4791	TGGATATGATGACTGAAA	mir-4791	1	0
lva-miR-71-5p	TGAAAGACATGGGTAGTGAGATT	NA	1	1
pma-miR-132-3p	TAACAGTCTACAGCCATGGAC	NA	1	1
mml-miR-31-5p	GGCAAGATGCTGGCATAGCTG	NA	1	1
efu-miR-191	GCTGCGCTTGGATTTCGTTCCCT	mir-191	1	0
ssa-miR-212a-5p	ACCTTGGCTTTAGACTGCTTACT	NA	1	0
aae-miR-92b-3p	AATTGCACTTGTCCCGGCCTGC	NA	1	6
mmu-miR-181b-2-3p	CTCACTGATCAATGAATGCAAA	NA	1	0
cfa-miR-139	TGGAGACGCGGCCCTGTTGGAA	mir-139	1	6
ccr-miR-133a-5p	AGCTGGTAAAATGGAACCAAA	NA	1	45
bta-miR-877	GTAGAGGAGATGGCGCAGGG	mir-877	1	1
tgu-miR-19a-5p	TAGTTTTGCATAGTTGCACT	NA	1	0
chi-miR-1185-5p	AGAGGATACCCTTTGTATGT	NA	1	3
efu-miR-1343	CCTCCTGGGGCCCGCACTCTCGCT	mir-1343	1	0
chi-miR-545-3p	TCAACAAACATTTATTGTGTGC	NA	1	2
ola-miR-139	TCTACAGTGCATGTGTCTCCA	mir-139	1	1
fru-let-7j	TGAGGTAGTTTTTTGTACAGTT	let-7	1	0
ssa-miR-144-3p	CTACAGTATAGATGATGTAC	NA	1	37
bta-miR-376b	ATCATAGAGGAAAATCCATGTT	mir-368	1	0
bta-miR-2284k	GAAAAGTTCGGTCGGGTTTTT	mir-2284	1	1
ppy-miR-331-3p	GCCCCTGGGCCTATCCTA	NA	1	0
mml-miR-193b-3p	AACTGGCCCTCAAAGTCCCGCT	NA	1	1
dan-miR-92b	AATTGCACTAGTCCCGGCCTGC	mir-25	1	0
chi-miR-21-3p	CAACAGCAGTCGATGGGCTGT	NA	1	11
oar-miR-3958-5p	AGGTTGTCCGTGATGTATTTGC	NA	1	1
eca-miR-590-5p	GAGCTTATTCATAAAAGTACAG	NA	1	0
oar-miR-127	ATCGGATCCGTCTGAGCTTGGCT	mir-127	1	0
mml-miR-135a-1-3p	ATATAGGGATTGGAGCCGTGGC	NA	1	2
eca-miR-345-5p	GCTGACTCCTAGTCCAGTGCTC	NA	1	0
hsa-miR-320e	AAAGCTGGGTTGAGAAGG	mir-320	1	0
mml-miR-381-5p	AGCGAGGTTGCCCTTTGTATATT	NA	1	0
mmu-miR-125b-2-3p	ACAAGTCAGGTTCTTGGGACCT	NA	1	0
oha-miR-129b-5p	CTTTTTGCGGTCTGGGCTTTC	NA	1	0
chi-miR-190a-3p	CTATATATCAAACATATTCCT	NA	1	1
chi-miR-877-5p	GTAGAGGAGATGGCGCAGGGG	NA	1	0
ggo-miR-877	GTAGAGGAGATGGCGCAGGGGACA	mir-877	1	0
mmu-miR-320-5p	GCCTTCTCTTCCCGGTTCTTCC	NA	1	0
gga-miR-30b-3p	CTGGGGGGTGGATGTTTACTTC	NA	1	1
mdo-miR-135b-5p	TATGGCTTTTCATTCCTATGTG	NA	1	1
eca-miR-3959	TGTATGTCAACTGATCCACAGTC	mir-379	1	1
xla-miR-24b	TGGCTCAGTTCAGCAGGACAG	mir-24	1	0
chi-miR-432-3p	ACTGGATGGCTCCTCCATGTCT	NA	1	4
chi-miR-412-3p	ACTTCACCTGGTCCACTAGCT	NA	1	0
efu-miR-23a	AATCACATTGCCAGGGATTTCCAAT	mir-23	1	0
oar-miR-370-5p	CAGGTCACGTCTCTGCAGTTAC	NA	1	0
bta-miR-208a	ATAAGACGAGCAAAAAGCTTGT	mir-208	1	3
ola-miR-455-3p	TGCAGTCCATGGGCATATAC	NA	1	3
bta-miR-2384	AACTGTACTGGAAGGATGGATGG	NA	1	0
oan-miR-215-3p	TCTGTCATTTCTGTAGGCCAAA	NA	1	0
ssa-miR-30d-5p	TGTAAACATCCTTGACTGAAAGCT	NA	1	2
efu-let-7c	GTTGAGGTAGTAGGTTGTATGGTTT	let-7	1	0
rno-miR-200c-5p	CGTCTTACCCAGCAGTGTTTG	NA	1	0
hhi-miR-301	CAGTGCAATAGTATTGTCAAAGCA	mir-130	1	0
mml-miR-376a-1-5p	GTAGATTCTCCTTCTATGAGTAC	NA	1	1
mml-miR-1277	TACGTAGATATATATGTATTT	mir-1277	1	0
chi-miR-504	AGACCCTGGTCTGCACTCTGT	mir-504	1	33
sha-miR-125b	ACAGGTCAGGCTCTTGGGACC	mir-10	1	13
mml-miR-374a-3p	CTTATCAGATTGTATTGTAATT	NA	1	1
ssc-miR-2411	TGGAGTGACTGTCAGATGCAGC	mir-2411	1	3
chi-miR-342-5p	AGGGGTGCTATCTGTGGTTGAGG	NA	1	0
bta-miR-21-3p	AACAGCAGTCGATGGGCTGTCT	NA	1	0
rno-miR-19b-1-5p	AGTTTTGCAGGTTTGCATCCAG	NA	1	0
ipu-miR-181c	CACATTCATTGCTGTCGGTGGGT	mir-181	1	0
bmo-miR-10-3p	CAAATTCGGTTCTAGAGAGGTTT	NA	1	2
bta-miR-410	AATATAACACAGATGGCCTGT	mir-154	1	14
mmu-miR-324-3p	CCACTGCCCCAGGTGCTGCT	NA	1	4
ola-let-7e	TGAGGTAGTAGATTGAAT	let-7	1	1
oha-miR-16b-3p	CCAATATTATTGTGCTGCTT	NA	1	0
chi-miR-15a-3p	CAGGCCATATTGTGCTGCCTCA	NA	1	2
bta-miR-3432b	TTCGGGATCTTTAGTTGTGGT	mir-3432	1	0
gga-miR-1a-2-5p	ACATACTTCTTTATGTACCCATA	NA	1	5
chi-miR-2404	TTGCACTGCATGGTATCTG	NA	1	1
gga-miR-193b-5p	CGGGGTTTTGGGGGCGAGATGA	NA	1	0
mmu-miR-182-5p	TTTGGCAATGGTAGAACTCACACCG	NA	1	0
mdo-miR-210-3p	ACTGTGCGTGTGACAGCGGCT	NA	1	0
chi-miR-451-3p	TTTAGTAATGGTAACGGTTCT	NA	1	3
bta-miR-192	CTGACCTATGAATTGACAGCCAG	mir-192	1	4
chi-miR-376a	GTAGATTCTCCTTCTATGAGT	mir-368	1	2
bta-miR-2903	TTCCGCGCTCTACGCCAGC	NA	1	0
eca-miR-451	AAACCGTTACCATTACTGTGTT	mir-451	1	36
bta-miR-488	TTGAAAGGCTGTTTCTTGGTC	mir-488	1	0
chi-miR-330-5p	TCTCTGGGCCTGTGTCTTAG	NA	1	7
chi-miR-340-5p	TTATAAAGCAATGAGACTGATT	NA	1	0
xtr-miR-153	TTGCATAGTCACAAAAGTGA	NA	1	0
ccr-miR-10c	TACCCTGTAGATCCGGATTTGTG	mir-10	1	0
chi-miR-9-3p	ATAAAGCTAGATAACCGAAA	NA	1	0
chi-miR-449a-3p	TCAGCTAACATGCAACTGCTATC	NA	1	0
lva-miR-133-3p	TTTGGTCCCCTTCAACCAGCCGT	NA	0	98
bta-miR-383	AGATCAGAAGGTGATTGTGGCT	mir-383	0	23
mml-miR-324-3p	ACTGCCCCAGGTGCTGCTGG	NA	0	15
cfa-miR-363	AATTGCACGGTATCCATCTGTAA	mir-363	0	13
cfa-miR-181c	AACATTCAACCTGTCGGTGAGTT	mir-181	0	10
oan-miR-133c	TTTGGTCCCCTTCAACCGGCTG	mir-133	0	10
tgu-miR-1-2-5p	ACATACTTCTTTATGTACCCAT	NA	0	8
bta-miR-2411-3p	GCTGAACTGTCTTACTCCCACATCC	NA	0	7
gga-miR-130b-3p	CAGTGCAATAATGAAAGGGCGT	NA	0	7
xtr-miR-192	ATGACCTATGAATTGACAGCC	mir-192	0	6
cgr-miR-196c	TAGGTAGTTTCGTGTTGTTGGG	mir-196	0	6
gga-miR-2954	CATCCCCATTCCACTCCTAGCA	mir-2954	0	6
gga-miR-146c-5p	TGAGAACTGAATTCCATGGACTG	NA	0	5
gga-miR-1451-5p	TCGCACAGGAGCAAGTTACCGC	NA	0	5
tgu-miR-2954-3p	CATCCCCATTCCACTCCTAGCAG	NA	0	5
xla-miR-20	CAAAGTGCTCATAGTGCAGGTAG	mir-17	0	5
tgu-miR-499-5p	TTAAGACTTGTAGTGATGTTTA	NA	0	5
ssa-miR-454-3p	TAGTGCAATATTGCTTATAGGGTCT	NA	0	5
aca-miR-196c-5p	TAGGTAGTTTCACGTTGTTGGG	NA	0	5
ipu-miR-375	TTTGTTCGTTCGGCTCGCGTT	NA	0	5
gga-miR-2188-5p	AAGGTCCAACCTCACATGTCCT	NA	0	4
tgu-miR-138-1-3p	GCTACTTCACAACACCAGGGT	NA	0	4
xtr-miR-455	TATGTGCCCTTGGACTACATCG	mir-455	0	4
cte-miR-92c	ATTGCACTTGTCCCGGCCTGCT	mir-25	0	4
mmu-let-7a-2-3p	CTGTACAGCCTCCTAGCTTTC	NA	0	4
bta-miR-7857	ATAGCCAGTTGGGGAAGAATGC	mir-7857	0	4
bbe-miR-375-3p	TTTGTTCGTTCGGCTCGCGTTAT	NA	0	4
gga-miR-499-3p	AACATCACTTTAAGTCTGTGCT	NA	0	4
ola-miR-22	AAGCTGCCAGCTGAAGAACTG	NA	0	4
sha-miR-133a	TTTGGTCCCCTTCAACCAG	mir-133	0	4
oar-miR-3957-3p	ACGCACAGCACCTCACTGAGCT	NA	0	4
gga-miR-130b-5p	CCTCTTTCCCTGTTGCACTACT	NA	0	4
rno-miR-1306-3p	GACGTTGGCTCTGGTGGTGATG	NA	0	3
eca-miR-338-5p	AACAATATCCTGGTGCTGAGTG	NA	0	3
gga-miR-1662	TTGACATCATCATACTTGGGAT	mir-1662	0	3
mml-miR-196b-3p	CGACAGCACGACACTGCCTTCA	NA	0	3
gga-miR-365-2-5p	GAGGGACTTTCAGGGGCAGCTGT	NA	0	3
gga-miR-30c-2-3p	TGGGAGAAGGCTGTTTACTCT	NA	0	3
cfa-miR-137	TTATTGCTTAAGAATACGCGT	mir-137	0	3
pma-miR-133a	TTGGTCCCCTTCAACCAGCTTG	mir-133	0	3
xtr-miR-137	TATTGCTTAAGAATACGCGTAG	NA	0	3
gga-miR-2131-5p	ATGCAGAAGTGCACGGAAACAGCT	NA	0	3
bta-miR-216b	AAATCTCTGCAGGCAAATGTGA	mir-216	0	3
mdo-miR-210-5p	AGCCACTGACTAACGCACATTG	NA	0	3
rno-miR-208b-3p	ATAAGACGAACAAAAGGT	NA	0	3
aca-miR-1306	TGGACGTTGGCTCTGGTGGTGA	mir-1306	0	3
mmu-miR-133a-5p	GCTGGTAAAATGGAACCAAAT	NA	0	3
cin-miR-1-3p	TGGAATGTAAAGAAGTATGCGT	NA	0	2
bta-miR-137	TTATTGCTTAAGAATACGCGTAG	mir-137	0	2
eca-miR-139-3p	GGAGACGCGGCCCTGTTGGAGT	NA	0	2
mmu-let-7g-3p	ACTGTACAGGCCACTGCCTTGC	NA	0	2
tgu-miR-455-3p	TGCAGTCCATGGGCATATACA	NA	0	2
tni-miR-204b	TTCCCTTTGTTATCCTATGCCT	mir-204	0	2
ola-miR-132	TAACAGTCTACAGCCATGG	mir-132	0	2
xtr-miR-338	TCCAGCATCAGTGATTTTGTTG	NA	0	2
chi-miR-181c-3p	ACCATCGACCGTTGAGTGGACC	NA	0	2
tgu-miR-365-1-5p	GGGACTTTTGGGGGCAGATGTGT	NA	0	2
aca-miR-98-3p	TATACAACTTACTACTTTCC	NA	0	2
ggo-miR-323a	CACATTACACGGTCGACCTC	mir-154	0	2
chi-miR-181c-5p	AACATTCAACCTGTCGGTGAG	NA	0	2
fru-miR-152	TCAGTGCATAACAGAACTTTGT	mir-148	0	2
mmu-miR-138-2-3p	GCTATTTCACGACACCAGGGT	NA	0	2
lva-miR-92a-3p	TATTGCACTTGTCCCGGCCTACT	NA	0	2
chi-miR-34c-3p	AATCACTAACCACACGGCCAGG	NA	0	2
xtr-miR-31a	AGGCAAGATGTTGGCATAGCTG	mir-31	0	2
ola-miR-9a-3p	ATAAAGCTAGATAACCGAAAG	NA	0	2
mmu-miR-455-3p	GCAGTCCACGGGCATATACAC	NA	0	2
gga-miR-30c-1-3p	TGGGAGAGGATTGTTTACGCC	NA	0	2
chi-miR-454-5p	ACCCTATCGATATTGTCTCTG	NA	0	2
ssc-miR-155-5p	TTAATGCTAATTGTGATAGGGG	NA	0	2
bta-miR-483	TCACTCCTCTCCTCCCGTCTT	mir-483	0	2
rno-miR-204-3p	GCTGGGAAGGCAAAGGGACGTT	NA	0	2
tch-miR-491-5p	AGTGGGGAACCCTTCCATGAGGAG	NA	0	2
mmu-miR-29b-2-5p	CTGGTTTCACATGGTGGCTTAGATT	NA	0	2
chi-miR-2411-3p	CTGAACTGTCTTACTCCCACATC	NA	0	2
aca-miR-144-5p	GGATATCATCATATACTGTAA	NA	0	2
pma-miR-1b	TGGAATGTAAAGAAGTATGGGT	mir-1	0	2
eca-miR-615-3p	TCCGAGCCTGGGTCTCCCTCTC	NA	0	2
efu-miR-487	GTGGTTATCCCTGCTGTGTTCG	mir-154	0	2
aca-miR-132-3p	TAACAGTCTACAGCCATGGTTG	NA	0	1
bbe-miR-22-3p	AAGCTGCCAGATGAAGAGCTGT	NA	0	1
pma-miR-133b-5p	CGCTGGTAAAATGGAACCAAAT	NA	0	1
dre-miR-22a-5p	AGTTCTTCACTGGCAAGCTTTA	NA	0	1
rno-miR-146b-3p	CCTAGGGACTCAGTTCTGGTG	NA	0	1
oan-miR-20a-1-3p	ACTGCATTATGAGCACTTCAAGT	NA	0	1
xtr-miR-24a-5p	GTGCCTACTGAACTGATATCAGT	NA	0	1
hsa-miR-501-3p	AATGCACCCGGGCAAGGATTCT	NA	0	1
oar-miR-329b-5p	GAGGTTTTCTGGGTTTCTGTTTC	NA	0	1
sha-miR-383	CAGATCAGAAGGTGATTGTGGC	mir-383	0	1
pma-miR-456	CAGGCTGGTTAGATGGTTGTCA	mir-456	0	1
oar-miR-323a-5p	AGGTGGTCCGTGGCGCGTTCG	NA	0	1
sha-miR-130b	AGTGCAATGTTAAAAGGGCAT	mir-130	0	1
hsa-miR-6516-5p	TTTGCAGTAACAGGTGTGAGCA	NA	0	1
xtr-miR-140	AGTGGTTTTACCCTATGGTAG	mir-140	0	1
xla-miR-1b	TGGAATGTTAAGAAGTATGTA	mir-1	0	1
xtr-miR-320	AAAAGCTGGGTTGAGAGGTGA	NA	0	1
chi-miR-876-3p	TGGTGGTTTACAAAGTAATTC	NA	0	1
ola-miR-301b-5p	GCTCTGACAATGTTGCACTAC	NA	0	1
chi-miR-105a	TCAAATGCTCAGACTCCTGTGG	mir-105	0	1
hsa-miR-197-5p	CGGGTAGAGAGGGCAGTGGGAGG	NA	0	1
bta-miR-216a	TAATCTCAGCTGGCAACTGTGA	mir-216	0	1
rno-miR-129-1-3p	AAGCCCTTACCCCAAAAAG	NA	0	1
cgr-miR-532-3p	CCTCCCACACCCAAGGTTTGC	NA	0	1
chi-miR-1306-3p	ACGTTGGCTCTGGTGGTGATGG	NA	0	1
gga-miR-6615-3p	TGGCACTGATGTGTTCTCCACA	NA	0	1
ssc-miR-542-5p	TCGGGGATCATCATGTCACGA	NA	0	1
chi-miR-383	AGATCAGAAGGTGATTGTGGCTT	mir-383	0	1
pma-miR-124-3p	TAAGGCACGCGGTGAATGCCA	NA	0	1
aca-miR-210-3p	CTGTGCGTGTGACAGCGGCTA	NA	0	1
hsa-miR-7641	TTGATCTCGGAAGCTAAGC	NA	0	1
csa-miR-31	TGGCAAGATGTTGGCATAGCT	mir-31	0	1
mmu-miR-505-3p	CGTCAACACTTGCTGGTTTTCT	NA	0	1
hsa-miR-25-5p	AGGCGGAGACTTGGGCAATTG	NA	0	1
chi-miR-363-5p	CGGGTGGATCACGATGCAATTT	NA	0	1
mse-miR-2766	TCAGTCTTGTCGAATGGTGGGT	mir-2766	0	1
cgr-miR-147	GTGTGCGGAAATGCTTCTG	mir-147	0	1
hsa-miR-181c-3p	AACCATCGACCGTTGAGTGGAC	NA	0	1
bta-miR-375	TTTTGTTCGTTCGGCTCGCGTGA	mir-375	0	1
mmu-miR-370-5p	CAGGTCACGTCTCTGCAGTT	NA	0	1
aca-miR-20b-5p	CAAAGTGCTCATAGTGCAGGTA	NA	0	1
oar-miR-376a-5p	TAGATTCTCCTTCTATGAGTAC	NA	0	1
chi-miR-1224	GTGAGGACTCGGGAGGTGGAGG	mir-1224	0	1
rno-miR-299b-5p	CGGTTTACCGTCCCACATAC	NA	0	1
gga-miR-1559-5p	TTCGATGCTTGTATGCTACTCC	NA	0	1
mne-miR-211	TTCCCTTTGTCATCCTTCGCCT	mir-204	0	1
pma-miR-22a-3p	AAGCTGCCAGTTGAAGAGCTAT	NA	0	1
hsa-miR-3591-5p	TTTAGTGTGATAATGGCGTTTGA	NA	0	1
ccr-miR-101b	GTACAGTACTATGATAACTGA	mir-101	0	1
dre-miR-152	TCAGTGCATGACAGAACTTTGG	mir-148	0	1
bta-miR-503-3p	GGAGTATTGTTTCTGCTGCCCGG	NA	0	1
ola-miR-145	TCCAGTTTTCCCAGGAAT	mir-145	0	1
bta-miR-2447	TCTGGGAACCGGTTTGGCTGCT	NA	0	1
mml-miR-758-5p	ATGGTTGACCAGAGAGCACACG	NA	0	1
sha-miR-216b	AAATCTCTGCAGGCAAATGTG	mir-216	0	1
mml-miR-185-3p	AGGGGCTGGCTTTCCTCTGGT	NA	0	1
gga-miR-460a-5p	CCTGCATTGTACACACTGTGTG	NA	0	1
chi-miR-147-3p	GTGTGCGGAAATGCTTCT	NA	0	1
hsa-miR-192-3p	CTGCCAATTCCATAGGTCACAG	NA	0	1
oan-miR-1416	TCCTTAACTCATGCCGCTGTGC	mir-1426	0	1
ipu-miR-1388	ATCTCAGGTTCGTCAGCCCATGA	mir-1388	0	1
eca-miR-483	TCACTCCTCTCCTCCCGTCTTCTT	mir-483	0	1
efu-miR-500	AATGCACCTGGGCAAGGATTCTGA	mir-500	0	1
chi-miR-345-3p	CCCTGAACTAGGGGTCTGGAGG	NA	0	1
bta-miR-105a	TCAAATGCTCAGACTCCTGTGGT	mir-105	0	1
hsa-miR-365b-5p	AGGGACTTTCAGGGGCAGCTGT	NA	0	1
tgu-miR-1388-5p	AGGACTGTCTAACCTGAGAATG	NA	0	1
cgr-miR-345	GCTGACTCCTAGTCCAGTG	mir-345	0	1
ssa-miR-23b-5p	GGGTTCCTGGCGTGCTGATT	NA	0	1
efu-miR-138a	AGCTGGTGTTGTGAATCAGGCCGTT	mir-138	0	1
mmu-miR-101c	ACAGTACTGTGATAACTGA	NA	0	1
rno-miR-328b-3p	CTGGCCCTCTCTGCCCTA	NA	0	1
chi-miR-137	ATTGCTTAAGAATACGCGTAGT	mir-137	0	1
mml-miR-99b-3p	AAGCTCGTGTCTGTGGGTCCG	NA	0	1
bta-miR-6119-3p	GCAAATCATTTTTTACTCTCCAA	NA	0	1
dre-miR-133c-3p	TTTGGTCCCTTTCAACCAGCTA	NA	0	1
dan-miR-92a	CATTGCACTTGTCCCGGCCTAT	mir-25	0	1
ccr-miR-454b	TAGTGCAATATTGCTTATAGG	mir-454	0	1
hsa-miR-1-5p	ACATACTTCTTTATATGCCCAT	NA	0	1
aja-miR-21	CAACAGCAGTCGATGGGCTGTC	mir-21	0	1
hco-miR-5899	TACCCGTAATGTACATAGCTTGAG	NA	0	1
mml-miR-670-3p	TTTCCTCATATTCATTCAGG	NA	0	1
tgu-miR-456-3p	CAGGCTGGTTAGATGGTTGTC	NA	0	1
mmu-miR-122-3p	AAACGCCATTATCACACTAA	NA	0	1
mml-miR-543-5p	GAAGTTGCCCGTGTCTTTTTCG	NA	0	1
efu-miR-378	CACTGGACTTGGAGTCAGAAGGCC	mir-378	0	1
xtr-miR-216	TAATCTCAGCTGGCAACTGTG	mir-216	0	1
rno-miR-412-3p	CTTCACCTGGTCCACTAGCCGT	NA	0	1
oha-miR-122-5p	TGGAGTGTGACAATGGTGTTTGTAT	NA	0	1
hsa-miR-1973	ACCGTGCAAAGGTAGCATA	NA	0	1
ggo-miR-188	CATCCCTTGCATGGTGGAGGGTG	mir-188	0	1
tgu-miR-194-3p	CCAGTGGAGATGCTGTTACTTT	NA	0	1
cfa-miR-135a-3p	TGTAGGGATGGAAGCCATGAAA	NA	0	1
ola-miR-130c	CAGTGCAATATTAAAAGGG	mir-130	0	1
bta-miR-181c	AACATTCAACCTGTCGGTGAGTTT	mir-181	0	1
bmo-miR-278-3p	TCGGTGGGATCTTCGTCCGTTT	NA	0	1
gga-miR-1416-5p	TCCTTAACTCATGCCGCTGTG	NA	0	1
cgr-miR-377-5p	AGAGGTTGCCCTTGGTGAATTCG	NA	0	1
efu-miR-7a	CTGGAAGACTAGTGATTTTGTTGTT	mir-7	0	1
ccr-miR-130b	CAGTGCAATAATGAAAGGGCAT	mir-130	0	1
oan-miR-7-1-3p	CAACAAATCGCAGTCTGCCATA	NA	0	1
ssa-miR-152-3p	TCAGTGCATAACAGAACTTTG	NA	0	1
ola-miR-30d-3p	CTTTCAGTCTGATGTTTGCAGC	NA	0	1
hsa-miR-196a-3p	CGGCAACAAGAAACTGCCTGAG	NA	0	1
cgr-miR-100-3p	CAAGCTTGTGTCTATAGGTATG	NA	0	1
oan-miR-139-5p	TCTACAGTGCATGTGTCTCCAG	NA	0	1
chi-miR-187	TCGTGTCTTGTGTTGCAGCC	mir-187	0	1
ccr-miR-187	TCGTGTCTTGTGTTGCAGCCAGT	mir-187	0	1
xbo-miR-92a	TATTGCACTCGTCCCGGCCTGAC	mir-25	0	1
rno-miR-370-5p	CAGGTCACGTCTCTGCAGTTACAC	NA	0	1
mdo-miR-873-5p	TGCAGGAACTTGTGAGTCTCC	NA	0	1
bta-miR-615	GGGGGTCCCCGGTGCTCGGATC	mir-615	0	1
ccr-miR-489	TGACATCATATGTACGGCTGCT	mir-489	0	1
eca-miR-1307	ACTCGGCGTGGCGTCGGTCGTGGTA	mir-1307	0	1
