# Supplementary material for: Differential expression profiles of microRNAs in musk gland of unmated and mated forest musk deer (Moschus berezovskii)
Source: PeerJ. 2021 Dec 22;9:e12710. doi: 10.7717/peerj.12710 (PMC8710055; doi:10.7717/peerj.12710)
Supplement: Supplemental Information 4 [file peerj-09-12710-s004.xlsx]

## Sheet: Novel_miRNAs
Table S4. Novel microRNAs predicted by miRDeep2
miRNA Name	Provisional ID	Mature sequence	Star sequence	Precursor sequence	Precursor coordinate	miRDeep2 score		Total read count		Mature read count		Star read count
						UM	MM	UM	MM	UM	MM	UM	MM
mbe-miR-new-1	c105684_g1_672	accugggccccugguggagaauc	uuccccccagggccccucacgcag	accugggccccugguggagaaucugugcucaaggucagguuccccccagggccccucacgcag	c105684_g1:185..248:+	9.4	13	15	23	12	20	3	3
mbe-miR-new-2	c110383_g1_1063	acagcaggcacagacaggcagu	ugccugucuacacuugcugugc	ugccugucuacacuugcugugcagaacauccgcucaccuguacagcaggcacagacaggcagu	c110383_g1:42..105:+	1900	2000	3747	4012	3237	3441	508	570
mbe-miR-new-3	c1133_g1_2895	aucacaucaacacucguccguu	aacgggcgggugcugaugagau	aucacaucaacacucguccguucuuaaauaacauugagaacgggcgggugcugaugagau	c1133_g1:102..162:-	180	3	355	228	346	221	9	7
mbe-miR-new-4	c131068_g1_2379	aaacccuagugaacuuuuuggu	aaaaaguucauucgaguuuu	aaaaaguucauucgaguuuuuuccauaagacauuacagaaaaacccuagugaacuuuuuggu	c131068_g1:136..198:+	21	2.1	39	42	38	39	1	3
mbe-miR-new-5	c127060_g1_5861	uucaccaccuucuccacccagc	cggguagagagggcagugg	cggguagagagggcagugggagguaagagcucuucacccuucaccaccuucuccacccagc	c127060_g1:350..411:+	2.5	670	739	1325	739	1321	0	3
mbe-miR-new-6	c133908_g1_1929	uagcaccaucugaaaucgguu	ugauuucuuuugguguucagagu	ugauuucuuuugguguucagagucaauauaauuuucuagcaccaucugaaaucgguu	c133908_g1:333..390:+	110000	66000	219340	130796	219138	130650	202	146
mbe-miR-new-7	c136481_g1_2989	uuugguccccuucaaccagcugu	agcugguaaaauggaaccaaau	agcugguaaaauggaaccaaaucgccucuucaauggauuugguccccuucaaccagcugu	c136481_g1:836..896:+	540	2.1	1060	48945	1050	48780	10	164
mbe-miR-new-8	c137651_g1_417	caaaaguucgcuuggguuuucc	gaagaccugaacgaacuuuugg	caaaaguucgcuuggguuuuccauaagauagaaugggaagaccugaacgaacuuuugg	c137651_g1:155..213:-	6.6	10	10	17	8	9	2	8
mbe-miR-new-9	c139698_g1_1486	aaaaaguuuguuuggguuuuuc	aaaauccaaacgaacuuuuuggc	aaaaaguuuguuuggguuuuucguauuauauauaacaccucaugggaaaauccaaacgaacuuuuuggc	c139698_g1:56..125:+	64	73	123	141	94	119	29	22
mbe-miR-new-10	c151590_g1_47	uguaaacacccuacacucucagc	cugggagaaggcuguuuacu	uguaaacacccuacacucucagcugugcacagugagagagcugggagaaggcuguuuacu	c151590_g1:1891..1951:-	6500	11000	12842	22053	12826	21954	16	99
mbe-miR-new-11	c164658_g1_565	agcagagugggucuauugcau	ugcaaugaacccuucucugcauc	agcagagugggucuauugcauaguccacccugccauucugugcaaugaacccuucucugcauc	c164658_g1:68..131:-	6.6	2.3	11	10	9	8	2	2
mbe-miR-new-12	c193900_g1_2437	acaguagucugcacauugguu	cccaguguucagacuaccuguu	cccaguguucagacuaccuguucagggggcucugaauguguacaguagucugcacauugguu	c193900_g1:180..242:+	310000	170000	619236	346976	407786	237167	211447	109809
mbe-miR-new-13	c199787_g1_2241	ugaaauguuuaggaccacuaga	agugguucuuaacaguuc	agugguucuuaacaguucaacaguucuguagcgcaauugugaaauguuuaggaccacuaga	c199787_g1:140..201:+	95000	8100	187773	15952	187682	15926	88	26
mbe-miR-new-14	c25379_g1_1222	ugagguaguaguuugugcuguug	cugcgcaagcuacugccuugc	ugagguaguaguuugugcuguuggucggguugugacauugcccgcuguggagauaacugcgcaagcuacugccuugc	c25379_g1:144..221:+	31000	37000	62707	72593	62616	72218	91	375
mbe-miR-new-15	c29383_g1_570	uggcucaguucagcaggaacagg	gugccuacugagcugauaucagu	gugccuacugagcugauaucaguucucauuucacacacuggcucaguucagcaggaacagg	c29383_g1:2146..2207:-	170000	2	343979	269425	343826	269278	153	147
mbe-miR-new-16	c29383_g1_572	uucacaguggcuaaguucugc	agagcuuagcugauuggugaaca	agagcuuagcugauuggugaacagugacugguuuccgcuuuguucacaguggcuaaguucugc	c29383_g1:2684..2747:-	210000	98000	414493	193793	414271	193610	221	182
mbe-miR-new-17	c29383_g1_574	aucacauugccagggauuaccacg	uuggguuccuggcaugcugauu	uuggguuccuggcaugcugauuugugacuuaagauuaaaaucacauugccagggauuaccacg	c29383_g1:2910..2973:-	46000	2.2	90443	57013	90172	56726	271	286
mbe-miR-new-18	c29787_g1_2670	uagcaccauuugaaaucagu	cugguuucacaugguggcuuaga	cugguuucacaugguggcuuagauuuuuccaucuuuguaucuagcaccauuugaaaucagu	c29787_g1:814..875:-	4000	2700	8028	5458	7987	5388	41	70
mbe-miR-new-19	c29963_g1_2629	uggaauguaaagaaguauggau	acauacuucuuuauguacccau	acauacuucuuuauguacccauaugaacauacaaugcuauggaauguaaagaaguauggau	c29963_g1:730..791:+	1.3	46000	2836	90435	2836	90419	0	16
mbe-miR-new-20	c30294_g1_2356	gaaaccugagugaacuucuugg	aaaaguucauuuggguuguucc	aaaaguucauuuggguuguuccuuaacagcuuauggggaaaccugagugaacuucuugg	c30294_g1:954..1013:-	19	20	35	38	20	29	15	9
mbe-miR-new-21	c31253_g2_151	uagcuuaucagacugauguuga	caacagcagucgaugggcugu	uagcuuaucagacugauguugacuguugaaucucauggcaacagcagucgaugggcugu	c31253_g2:594..653:-	470000	150000	937692	313380	937639	313334	53	46
mbe-miR-new-22	c32187_g1_347	aucccuucuccaucugacacag	ccagucagauggcuuggggugaaa	ccagucagauggcuuggggugaaauccucuuaaucuucugucaucccuucuccaucugacacag	c32187_g1:843..907:+	14	0	28	0	24	0	4	0
mbe-miR-new-23	c33441_g1_2218	aaaaccugaaugaacuuuuugg	caaaaguucauucaaguuuu	caaaaguucauucaaguuuuuauuuuuuaacauuuucuggaaaaaccugaaugaacuuuuugg	c33441_g1:443..506:-	66	56	128	108	127	107	1	1
mbe-miR-new-24	c35930_g1_1997	aaaacccgaacgaacuuuuugga	ugaaaaguucguucaggguuu	ugaaaaguucguucaggguuucccaagcauggcauggaaaaacccgaacgaacuuuuugga	c35930_g1:760..821:+	23	17	43	31	38	27	5	4
mbe-miR-new-25	c35930_g1_1999	aaaaaguucguucggguuuuu	aaacccugaacgaacuuuu	aaaaaguucguucggguuuuuccaugccaugcuugggaaacccugaacgaacuuuu	c35930_g1:761..817:-	770	700	1508	1375	1507	1373	1	2
mbe-miR-new-26	c35930_g3_541	aaaacccgaacgaacuuuuugga	uaaagguuuuguuuggguuuuc	uaaagguuuuguuuggguuuucuguaagaugggaauggaaaaacccgaacgaacuuuuugga	c35930_g3:547..609:+	20	1.2	39	28	38	27	1	1
mbe-miR-new-27	c36356_g1_857	ugagguaguagguuguauaguuu	cuauacaaucuacugucuuucc	ugagguaguagguuguauaguuuggggcucugcccugcuaugggauaacuauacaaucuacugucuuucc	c36356_g1:45..115:-	12000	6000	24530	11907	23190	10906	1338	1001
mbe-miR-new-28	c37020_g1_1911	uaauuuuauguauaagcuagu	gagcuuauucauaaaaguacagu	gagcuuauucauaaaaguacaguauaauccaguaaaccuguaauuuuauguauaagcuagu	c37020_g1:1305..1366:+	72	0.7	143	47	142	47	1	0
mbe-miR-new-29	c37920_g1_1813	gccccugggccuauccuagaac	ucuagguauggucccagggau	ucuagguauggucccagggaucccagaucaaaccaggccccugggccuauccuagaac	c37920_g1:66..124:+	0	390	0	769	0	556	0	213
mbe-miR-new-30	c38862_g1_2084	aaaaaguucguuuggguuuuuc	aaaacccaaaugaacuuuuugg	aaaaaguucguuuggguuuuucuuaagauguuauuaauaaaaacccaaaugaacuuuuugg	c38862_g1:914..975:+	51	39	99	76	87	66	12	10
mbe-miR-new-31	c41154_g2_1346	guccaguuuucccaggaauccc	auuccuggaaauacuguucuu	guccaguuuucccaggaaucccuuagaugcuaagauggggauuccuggaaauacuguucuu	c41154_g2:1699..1760:+	21000	130000	41840	255351	37903	242243	3929	13099
mbe-miR-new-32	c41154_g2_1343	ugagaugaagcacuguagcu	ggugcagugcugcaucucugguc	ggugcagugcugcaucucuggucaguugggagucugagaugaagcacuguagcu	c41154_g2:315..369:+	33000	330000	65096	660022	64548	652307	548	7715
mbe-miR-new-33	c41817_g1_607	uggagagaacagguggcuuuc	aagccaccagagcucuguccuua	uggagagaacagguggcuuucuugaggccauugguuggaagccaccagagcucuguccuua	c41817_g1:56..117:-	29	28	55	52	50	43	5	9
mbe-miR-new-34	c42862_g3_4208	ucccuguccuccaggagcucacu	gcgcuccucgaggccagagc	ucccuguccuccaggagcucacuugguccaaccgugcgcuccucgaggccagagc	c42862_g3:2878..2933:+	2.4	5900	18597	11691	18367	11493	230	198
mbe-miR-new-35	c43795_g4_3127	ugaggggcagagagcgagacuuu	agcucggucugaggccccucagu	ugaggggcagagagcgagacuuuucuauuuuccaaaagcucggucugaggccccucagu	c43795_g4:2473..2532:-	1300	1800	2554	3586	1520	2386	1034	1200
mbe-miR-new-36	c44112_g1_2442	cucagucagccuuguggaugua	caucuagaggacugauugaaau	cucagucagccuuguggauguauguucugcagaccugacaucuagaggacugauugaaau	c44112_g1:3277..3337:+	420	450	840	884	703	763	137	121
mbe-miR-new-37	c44474_g2_1739	aagcugccaguugaagaacugu	aguucuucaguggcaagcuuu	aguucuucaguggcaagcuuuauguccugacccagcuaaagcugccaguugaagaacugu	c44474_g2:290..350:+	10000	44000	21438	87930	20988	87091	450	839
mbe-miR-new-38	c46188_g2_706	aagguagauagaacaggucuugu	agaccuacuuaucuaccaacagc	aagguagauagaacaggucuugugugcaaaaugaauucaagaccuacuuaucuaccaacagc	c46188_g2:1484..1546:+	920	640	1808	1273	1775	1189	32	83
mbe-miR-new-39	c47368_g1_1355	aaaacccgaaugaacuuuugg	aaaaaguugguuuggguugucu	aaaaaguugguuuggguugucuguaacaucuuauggaaaaacccgaaugaacuuuugg	c47368_g1:4449..4507:+	54	0	104	0	101	0	3	0
mbe-miR-new-40	c47605_g2_2568	ccccaucccugaucuuggucauc	ugaccaggaugagggagguaga	ccccaucccugaucuuggucauccugaagguguuuucugggagcagaguuagugaugaccaggaugagggagguaga	c47605_g2:7401..7478:+	5.9	0	9	0	6	0	3	0
mbe-miR-new-41	c49289_g1_3111	aaaaaguucguuuggguuuuuc	aaagccugaaugaacuuuuuug	aaaaaguucguuuggguuuuucuauagcauauggaaaagccugaaugaacuuuuuug	c49289_g1:98..155:-	50	43	96	82	87	66	9	16
mbe-miR-new-42	c52155_g1_2499	aaaacuggaaugaacuuuuuggc	aaaaaguucguucagauuuuuc	aaaaaguucguucagauuuuuccauaagauguuacggaaaaacuggaaugaacuuuuuggc	c52155_g1:265..326:+	18	0	34	0	26	0	8	0
mbe-miR-new-43	c53805_g1_1811	caacaaaucacagucugccaua	uggaagacuagugauuuuguuguuu	uggaagacuagugauuuuguuguuuuuagauaacugaaucgacaacaaaucacagucugccaua	c53805_g1:342..406:+	200	180	393	354	346	328	46	26
mbe-miR-new-44	c6221_g1_1071	caaaaaguuuguuuggguuuu	aaaucucgaaugaacuuuuuggu	caaaaaguuuguuuggguuuucacauaccaucauacagaaaaucucgaaugaacuuuuuggu	c6221_g1:168..230:-	8.3	2	14	29	12	29	2	0
mbe-miR-new-45	c73900_g1_2317	agcuacauugucugcuggguuu	accuggcauacaauguagauuu	accuggcauacaauguagauuucuguguuuguugagcaacagcuacauugucugcuggguuu	c73900_g1:479..541:+	32000	14000	63081	28072	62467	27995	614	77
