# Supplementary material for: Differential expression profiles of microRNAs in musk gland of unmated and mated forest musk deer (Moschus berezovskii)
Source: PeerJ. 2021 Dec 22;9:e12710. doi: 10.7717/peerj.12710 (PMC8710055; doi:10.7717/peerj.12710)
Supplement: Supplemental Information 5 [file peerj-09-12710-s005.xlsx]

## Sheet: Sheet1
TableS5. MiRNAs showing differential expression between the two libraries
microRNAs Names	TPM (UM)	TPM (MM)	log2(FC)	p-value	q-value	Up/ Down
mdo-miR-206	0	93.7071	-7.48895	3.32778e-26	3.98877e-25	Down
bta-miR-206	24.9548	2499.65	-7.11189	0	0	Down
ssc-miR-133b	0	39.7185	-6.88803	1.96443e-12	1.53471e-11	Down
bta-miR-133a	1.08052	86.5721	-6.78973	2.07569e-25	2.42164e-24	Down
chi-miR-206	4.63078	357.348	-6.73555	1.0749e-99	2.76629e-98	Down
xtr-miR-451	40.3907	3036.68	-6.69795	0	0	Down
bta-miR-486	0	26.1619	-6.64826	9.12682e-09	5.82917e-08	Down
ssc-miR-206	5.81421	402.655	-6.57944	6.89305e-113	1.8277e-111	Down
chi-miR-133b	9.46738	535.962	-6.28864	3.72524e-151	1.16414e-149	Down
ggo-miR-133b	1.02906	57.021	-6.25771	1.29516e-17	1.3026e-16	Down
bta-miR-133b	0	13.6161	-6.19153	2.93271e-05	0.00013026	Down
xtr-miR-122	0	16.2917	-6.18732	4.85356e-06	2.33344e-05	Down
cgr-miR-122	0	15.9944	-5.93836	5.66506e-06	2.7087e-05	Down
chi-miR-133a-3p	37.5094	1569.89	-5.85289	0	0	Down
efu-miR-133-3p	0	24.4376	-5.77229	1.99669e-08	1.22175e-07	Down
chi-miR-451-5p	0	33.0591	-5.70573	6.699e-11	4.76555e-10	Down
bta-miR-1	137.38	5183.03	-5.70317	0	0	Down
cfa-miR-486	4.21916	136.874	-5.48537	3.64449e-40	5.79806e-39	Down
bta-miR-451	8.59268	271.251	-5.446	8.84342e-78	1.9841e-76	Down
cgr-miR-1	0	20.216	-5.38321	3.53338e-07	1.95677e-06	Down
pma-miR-1c-3p	51.8648	1502.11	-5.32171	0	0	Down
bta-miR-122	0	9.27558	-5.1523	0.000589712	0.00218643	Down
hsa-miR-143-5p	13.4807	318.343	-5.02723	1.20937e-89	2.86001e-88	Down
chi-miR-133a-5p	0	16.7674	-4.90692	4.40627e-06	2.1301e-05	Down
oar-miR-143	510.415	10461.1	-4.82285	0	0	Down
mmu-miR-145a-3p	0	11.1188	-4.76172	0.000198789	0.000780001	Down
bta-miR-143	16.4136	250.143	-4.39542	1.67844e-67	3.33782e-66	Down
chi-miR-143-5p	2.62411	38.5293	-4.34168	1.10731e-11	8.21101e-11	Down
chi-miR-144-5p	1.23488	13.9134	-3.95966	6.98029e-05	0.000296493	Down
xtr-miR-145	74.9672	773.025	-3.8318	2.89194e-189	1.10019e-187	Down
aca-miR-145-3p	2.46975	24.3781	-3.76877	2.23078e-07	1.25931e-06	Down
bta-miR-145	1075.01	10515.2	-3.75568	0	0	Down
dre-miR-145-5p	361.561	3340.22	-3.67325	0	0	Down
gga-miR-30a-3p	6.38019	42.8104	-3.21191	1.18151e-10	8.33728e-10	Down
bta-miR-22-3p	5.19677	32.524	-3.11144	3.1201e-08	1.86993e-07	Down
lla-miR-143	189.348	1184.12	-3.11033	6.72652e-245	3.26984e-243	Down
tgu-miR-144-3p	3.1901	19.8593	-3.10376	1.56175e-05	7.04399e-05	Down
ccr-miR-22a	2.46975	14.8647	-3.05508	0.000207387	0.000810106	Down
ccr-miR-143	896.88	5387.74	-3.05232	0	0	Down
cgr-miR-205	7.66652	42.5725	-2.9389	7.15924e-10	4.89401e-09	Down
cgr-miR-326	7.15199	39.4212	-2.92818	3.23122e-09	2.14191e-08	Down
ccr-miR-22b	3.55027	19.562	-2.92767	3.05394e-05	0.000134281	Down
chi-miR-338-5p	7.87233	43.3455	-2.92664	5.45385e-10	3.78739e-09	Down
chi-miR-30f-5p	41.4712	224.636	-2.90303	5.60902e-45	9.62331e-44	Down
cfa-miR-450b	4.57933	24.7349	-2.89896	3.07749e-06	1.50436e-05	Down
tgu-miR-140-3p	7.25489	38.1726	-2.86113	8.50987e-09	5.4751e-08	Down
chi-miR-22-3p	13.6865	71.529	-2.85139	3.58249e-15	3.29966e-14	Down
mdo-miR-22-3p	227.474	1173.66	-2.83286	6.35942e-222	2.92868e-220	Down
xtr-miR-22-3p	793.15	4025.78	-2.80922	0	0	Down
cfa-miR-339	14.87	75.3344	-2.80653	1.14388e-15	1.06478e-14	Down
rno-miR-145-3p	5.86566	29.4321	-2.79265	5.91767e-07	3.19627e-06	Down
aja-miR-145	16.8766	83.7775	-2.77716	4.40327e-17	4.28096e-16	Down
bta-miR-499	16.2077	80.3884	-2.77593	1.90344e-16	1.83023e-15	Down
cgr-let-7i	5.91711	28.5997	-2.73866	1.09938e-06	5.76021e-06	Down
bta-miR-30f	37.8181	175.106	-2.67671	1.00314e-32	1.32992e-31	Down
mdo-miR-145-3p	82.4794	376.018	-2.65432	1.10927e-67	2.25723e-66	Down
chi-miR-144-3p	4.01335	18.2539	-2.65095	0.00013022	0.00053244	Down
chi-let-7i-3p	4.57933	19.0268	-2.52045	0.000145359	0.000586124	Down
chi-miR-140-3p	36.789	147.517	-2.46916	1.36976e-25	1.61965e-24	Down
bta-miR-139	42.4489	163.393	-2.41017	1.94394e-27	2.3957e-26	Down
bta-miR-335	10.3421	39.4212	-2.39607	1.08651e-07	6.338e-07	Down
bta-miR-339b	64.4708	231.771	-2.3116	1.83333e-36	2.62978e-35	Down
oan-miR-145-5p	277.744	987.671	-2.2959	1.8848e-148	5.6869e-147	Down
bta-miR-196a	18.2144	64.5129	-2.29013	3.7148e-11	2.66431e-10	Down
chi-miR-196a	13.9438	46.1401	-2.19202	5.14066e-08	3.01885e-07	Down
chi-miR-145-3p	154.102	489.465	-2.13294	3.59271e-68	7.48482e-67	Down
chi-miR-378-5p	19.5522	60.7075	-2.10017	1.18969e-09	8.00753e-09	Down
chi-miR-335-5p	12.04	36.5077	-2.06598	3.05837e-06	1.50341e-05	Down
sha-miR-193	8.07815	24.3781	-2.05911	0.000141593	0.000573585	Down
eca-miR-378	22.9996	68.3182	-2.03629	2.53143e-10	1.772e-09	Down
ggo-miR-148a	6.79182	19.9782	-2.02218	0.000662138	0.00242415	Down
chi-miR-106b-3p	20.8385	59.994	-1.99119	5.17796e-09	3.38113e-08	Down
chi-miR-338-3p	22.0734	61.1832	-1.93645	6.97671e-09	4.52194e-08	Down
eca-miR-140-3p	38.5384	102.091	-1.87111	2.64361e-13	2.20301e-12	Down
chi-miR-22-5p	34.4222	88.0586	-1.82075	2.6391e-11	1.90844e-10	Down
tgu-miR-30a-3p	21.0443	52.1454	-1.77473	4.6708e-07	2.53848e-06	Down
bta-miR-140	90.5061	220.176	-1.74819	1.1891e-24	1.36903e-23	Down
bta-miR-193b	16.6708	40.3131	-1.73955	1.24509e-05	5.73394e-05	Down
xtr-miR-128	11.9886	28.7186	-1.72595	0.000244669	0.000938969	Down
chi-miR-193b-3p	44.4555	106.134	-1.72108	1.95399e-12	1.54031e-11	Down
xtr-let-7i	229.378	546.13	-1.71714	2.93253e-57	5.34576e-56	Down
chi-miR-3432-5p	19.3464	45.7239	-1.70651	4.40268e-06	2.14019e-05	Down
bta-miR-3431	13.4293	31.5132	-1.6962	0.00014741	0.000591668	Down
bta-miR-10a	39.4131	85.3235	-1.57989	2.92356e-09	1.95276e-08	Down
bta-miR-22-5p	13.8924	28.4213	-1.49831	0.000984386	0.00355925	Down
bta-miR-126-3p	215.795	428.282	-1.45453	5.89035e-36	8.18104e-35	Down
bta-miR-378	185.694	364.542	-1.43878	2.22281e-30	2.86024e-29	Down
bta-miR-197	41.5227	79.8532	-1.40907	1.32465e-07	7.67596e-07	Down
bta-miR-378b	31.3864	59.5778	-1.39026	6.4703e-06	3.07691e-05	Down
dre-miR-30c-5p	29.1739	54.4048	-1.36468	2.14137e-05	9.55968e-05	Down
eca-miR-1468	24.8519	45.1887	-1.32823	0.000148609	0.000593756	Down
efu-miR-196	41.9858	74.6803	-1.29645	1.698e-06	8.73972e-06	Down
cfa-miR-23a	92.5642	163.988	-1.29068	1.55848e-12	1.2397e-11	Down
oar-miR-30a-5p	335.217	586.621	-1.27295	5.43159e-40	8.48687e-39	Down
bta-miR-423-5p	104.81	179.566	-1.24236	6.94773e-13	5.62895e-12	Down
xtr-miR-29a	120.143	203.111	-1.22314	4.55825e-14	4.02875e-13	Down
bta-miR-30c	465.548	784.857	-1.21912	1.36137e-49	2.38239e-48	Down
bta-miR-28	120.246	200.257	-1.20149	1.51492e-13	1.28695e-12	Down
bta-miR-128	30.6146	50.54	-1.18883	0.000234607	0.000904322	Down
oar-miR-10b	263.131	431.85	-1.18037	1.03435e-26	1.25702e-25	Down
bta-miR-2284x	43.7352	71.4101	-1.17296	1.51713e-05	6.87816e-05	Down
cfa-miR-140	52.5851	85.3235	-1.16391	2.60294e-06	1.29408e-05	Down
bta-miR-214	44.1468	71.4101	-1.15944	1.81617e-05	8.14947e-05	Down
chi-miR-214-5p	31.9524	51.3724	-1.15069	0.000302073	0.00114919	Down
oar-let-7b	1755.32	2790.52	-1.13442	3.73188e-154	1.20941e-152	Down
chi-miR-423-3p	43.8381	69.329	-1.1269	3.65758e-05	0.000159223	Down
ssc-miR-199b-5p	466.474	733.722	-1.11906	9.18893e-41	1.48895e-39	Down
mdo-let-7d	30.7175	47.8049	-1.10372	0.000749493	0.00273253	Down
xtr-miR-30a-5p	132.646	205.847	-1.09961	3.04902e-12	2.36097e-11	Down
ggo-miR-146a	90.5061	137.766	-1.07176	2.29338e-08	1.39355e-07	Down
bta-let-7i	1741.38	2568.56	-1.02635	5.75443e-121	1.57348e-119	Down
bta-miR-148b	87.4189	128.015	-1.01592	2.52557e-07	1.41659e-06	Down
chi-miR-28-3p	170.824	247.527	-1.00069	1.42091e-12	1.14064e-11	Down
chi-miR-21-5p	23064.9	8289.75	1.01067	0	0	Up
gga-miR-142-5p	214.92	76.8803	1.01749	1.25274e-08	7.77412e-08	Up
pma-miR-26b-5p	160.688	57.0805	1.02757	6.98319e-07	3.74864e-06	Up
xtr-miR-26	5879.14	2080.29	1.0332	1.70832e-202	7.11799e-201	Up
oar-miR-27a	1868.73	660.885	1.03396	3.9274e-65	7.63661e-64	Up
bta-miR-125a	763.05	268.695	1.04019	8.33436e-28	1.05689e-26	Up
xtr-miR-221	495.237	170.825	1.06997	2.10896e-19	2.19683e-18	Up
bta-miR-195	1993.76	685.679	1.07426	9.74272e-74	2.13122e-72	Up
ipu-miR-99b	12327.7	4106.88	1.12017	0	0	Up
pma-miR-27a	135.27	44.4752	1.13915	7.42086e-07	3.9593e-06	Up
bta-miR-107	73.7838	23.6646	1.17495	0.000178875	0.000705025	Up
efu-miR-199	137.123	42.9293	1.20981	1.70884e-07	9.70934e-07	Up
bta-miR-26a	29296.4	9121.11	1.21782	0	0	Up
tgu-miR-17a-5p	157.035	48.8157	1.22005	1.77367e-08	1.09293e-07	Up
chi-miR-374a-5p	797.215	246.992	1.22488	3.52418e-37	5.31665e-36	Up
bta-miR-103	934.029	257.16	1.39518	1.5865e-52	2.83304e-51	Up
tch-miR-26a-2-5p	64.4194	17.5998	1.40631	5.67456e-05	0.000242207	Up
chi-miR-374a-3p	52.4822	14.2701	1.41321	0.000265054	0.00101276	Up
eca-miR-125a-5p	485.666	125.577	1.48577	9.96075e-31	1.30084e-29	Up
pma-miR-205a-5p	2748.37	625.923	1.6689	2.10788e-196	8.38361e-195	Up
bta-miR-15b	168.561	37.6969	1.69513	8.18439e-14	7.02092e-13	Up
cgr-miR-362	46.102	10.0485	1.73222	7.35058e-05	0.000309219	Up
bta-miR-362-5p	282.992	60.8264	1.75237	3.97596e-23	4.46021e-22	Up
xtr-miR-200b	86.3384	18.1349	1.78561	2.99894e-08	1.80971e-07	Up
bta-miR-21-5p	2311.64	478.287	1.80734	1.37686e-184	5.01979e-183	Up
cfa-miR-31	150.037	30.9781	1.81038	1.64169e-13	1.38123e-12	Up
ccr-miR-182-5p	34.5765	5.94589	2.07421	0.000106749	0.000442678	Up
cgr-miR-31-5p	68.3298	11.7134	2.07873	4.90481e-08	2.8998e-07	Up
bta-miR-205	1607.09	268.932	2.11351	7.28485e-158	2.45163e-156	Up
hsa-miR-221-5p	51.9162	8.68099	2.11463	1.53437e-06	7.94424e-06	Up
bta-miR-20a	98.0183	15.6971	2.17693	1.7384e-11	1.27823e-10	Up
chi-miR-200a	73.5266	11.3566	2.22911	3.38772e-09	2.22876e-08	Up
bta-miR-708	79.4437	12.0701	2.25287	6.21459e-10	4.28171e-09	Up
xtr-miR-107	46.6166	7.01614	2.26647	1.98436e-06	1.00948e-05	Up
bta-miR-182	134.601	20.0971	2.27801	5.25729e-16	5.00014e-15	Up
cgr-miR-182	33.2387	4.93508	2.2861	5.43372e-05	0.000234212	Up
bta-miR-31	95.2398	13.6161	2.34063	4.22012e-12	3.21096e-11	Up
chi-miR-429	28.1449	3.98374	2.35505	0.000156463	0.000619479	Up
bta-miR-200b	234.163	32.9997	2.36137	8.86547e-28	1.10818e-26	Up
dre-miR-141-3p	142.114	19.9782	2.36493	1.63675e-17	1.62745e-16	Up
rno-miR-200c-3p	30.3059	4.16212	2.39859	7.32321e-05	0.000309556	Up
xtr-miR-200a	531.46	72.1236	2.41579	1.77103e-62	3.29713e-61	Up
bta-miR-96	24.183	3.15132	2.47434	0.000310277	0.00117529	Up
sme-miR-31b-5p	61.1778	7.96749	2.47519	9.60092e-09	6.08754e-08	Up
bta-miR-200a	687.774	89.4261	2.47754	1.22328e-82	2.81675e-81	Up
efu-miR-200b	34.7823	4.39995	2.51717	1.2557e-05	5.75257e-05	Up
cfa-miR-200b	41.214	5.11346	2.54514	1.71851e-06	8.79353e-06	Up
ggo-miR-200b	3059.92	324.526	2.77146	0	0	Up
eca-miR-182	18.7289	1.90268	2.83354	0.000637091	0.00234224	Up
bta-miR-223	103.575	10.2269	2.87461	5.93383e-16	5.58291e-15	Up
chi-miR-200b	936.705	91.091	2.89659	6.94077e-132	1.95909e-130	Up
bta-miR-429	255.311	23.6052	2.96946	4.00651e-38	6.15035e-37	Up
oar-miR-200c	657.366	57.3778	3.05251	7.44153e-98	1.86038e-96	Up
pma-miR-203a-3p	18.6775	1.54593	3.12913	0.000345785	0.001293	Up
bta-miR-141	36.2745	2.73511	3.26366	3.74654e-07	2.04889e-06	Up
sha-miR-141	100.128	7.49182	3.27476	2.79002e-17	2.74299e-16	Up
xla-miR-223	100.179	7.0756	3.35796	1.25312e-17	1.27498e-16	Up
bta-miR-200c	2799.67	193.539	3.38894	0	0	Up
cfa-miR-203	1270.64	85.7991	3.42282	5.16309e-207	2.25885e-205	Up
ola-miR-223	28.505	1.60539	3.6846	2.27105e-06	1.14205e-05	Up
efu-miR-141	15.1272	0	4.20349	0.000329235	0.00124173	Up
